# Supplementary material for: Highly enantioselective cascade synthesis of spiropyrazolones
Source: Royal Society of Chemistry journal article supplement (doi:10.1039/c1ob05753g), 2011-01-01
Supplement: c1ob05753g.pdf [file c1ob05753g.pdf]

# **Highly enantioselective cascade synthesis of spiropyrazolones**

**Alex Zea<sup>a</sup>, Andrea-Nekane R. Alba<sup>a</sup>, Andrea Mazzanti<sup>b</sup>, Albert Moyano<sup>a</sup> and  
Ramon Rios<sup>a,c\*</sup>**

## **Supporting Information**

**NMR spectra and HPLC traces**

## General methods.

Chemicals and solvents were either purchased *puriss p.A.* from commercial suppliers or purified by standard techniques. For thin-layer chromatography (TLC), silica gel plates Merck 60 F254 were used and compounds were visualized by irradiation with UV light and/or by treatment with a solution of phosphomolybdic acid (25 g),  $\text{Ce}(\text{SO}_4)_2 \cdot \text{H}_2\text{O}$  (10 g), conc.  $\text{H}_2\text{SO}_4$  (60 mL), and  $\text{H}_2\text{O}$  (940 mL) followed by heating or by treatment with a solution of *p*-anisaldehyde (23 mL), conc.  $\text{H}_2\text{SO}_4$  (35 mL), acetic acid (10 mL), and ethanol (900 mL) followed by heating. Flash chromatography was performed using silica gel Merck 60 (particle size 0.040-0.063 mm),  $^1\text{H}$  NMR and  $^{13}\text{C}$  NMR spectra were recorded on Varian AS 400. Chemical shifts are given in ppm relative to tetramethylsilane (TMS) and the coupling constants *J* are given in Hz. The spectra were recorded in  $\text{CDCl}_3$  as solvent at room temperature. TMS served as internal standard ( $\delta = 0$  ppm) for  $^1\text{H}$  NMR,  $\text{CDCl}_3$  was used as internal standard ( $\delta = 77.0$  ppm) for  $^{13}\text{C}$  NMR. High-resolution mass spectra were recorded on a Bruker MicroTOF spectrometer.

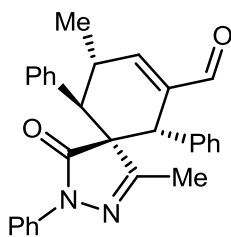

**7a:** White powder.  $^1\text{H NMR}$  ( $\text{CDCl}_3$ , 400 MHz)  $\delta$  (ppm): 0.95 (s, 3H), 1.21-1.19 (d,  $J = 7.2$  Hz, 3H), 3.09-3.07 (d,  $J = 10.0$  Hz, 1H), 3.53-3.48 (m, 1H), 4.17 (s, 1H), 7.40-7.08 (m, 14H), 7.77-7.75 (d,  $J = 8$  Hz, 2H), 9.51 (s, 1H). **IR** ( $\nu_{\text{max}}$ ,  $\text{cm}^{-1}$ ): 580, 638, 676, 694, 756, 798, 828, 874, 893, 921, 1017, 1122, 1163, 1282, 1374, 1446, 1485, 1494, 1512, 1599, 1690, 2925, 3020.  $^{13}\text{C NMR}$  ( $\text{CDCl}_3$ , 100 MHz)  $\delta$  (ppm): 15.9, 18.6, 34.8, 45.4, 47.2, 60.5, 119.5, 125.5, 127.8, 128.1, 128.4, 128.8, 129.0, 129.5, 131.9, 137.4, 137.9, 138.3, 138.4, 156.1, 161.6, 174.3, 192.5. **HRMS (ESI):** calcd. for  $[\text{M}+\text{Na}]^+$  ( $\text{C}_{29}\text{H}_{26}\text{N}_2\text{NaO}_2$ ) requires 457.1886, found 457.1904. **HPLC** (Chiralpak IA, *n*-hexane: *i*-PrOH = 95:5,  $\lambda = 254$  nm, 1.0 mL/min):  $t_{\text{R}} = 21.5, 32.8$  min.

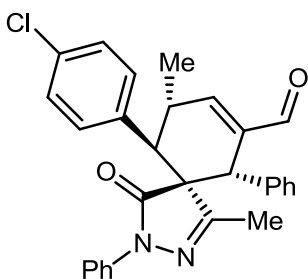

**7b:** White powder.  $^1\text{H NMR}$  ( $\text{CDCl}_3$ , 400 MHz)  $\delta$  (ppm): 0.95 (s, 3H), 1.20-1.18 (d,  $J = 7.2$  Hz, 3H), 3.08-3.06 (d,  $J = 10.4$  Hz, 1H), 3.48-3.43 (m, 1H), 4.17 (s, 1H), 7.41-7.03 (m, 13H), 7.77-7.75 (d,  $J = 7.6$  Hz, 2H), 9.50 (s, 1H).  $^{13}\text{C NMR}$  ( $\text{CDCl}_3$ , 100 MHz)  $\delta$  (ppm): 15.9, 18.5, 34.7, 45.4, 46.6, 60.4, 119.4, 120.7, 125.6, 127.7, 128.5, 128.8, 129.1, 129.2, 129.6, 131.9, 134.0, 137.1, 137.4, 137.8, 138.2, 155.6, 161.4, 174.1, 192.4. **IR** ( $\nu_{\text{max}}$ ,  $\text{cm}^{-1}$ ): 625, 688, 698, 758, 796, 818, 867, 891, 921, 1010, 1120, 1161, 1276, 1345, 1444, 1478, 1487, 1517, 1584, 1686, 2925, 3010. **HRMS (ESI):** calcd. for  $[\text{M}+\text{Na}]^+$  ( $\text{C}_{29}\text{H}_{25}\text{ClN}_2\text{NaO}_2$ ) requires 491.1497, found 491.1492. **HPLC** (Chiralpak IA, *n*-hexane: *i*-PrOH = 90:10,  $\lambda = 254$  nm, 1.0 mL/min):  $t_{\text{R}} = 10.1, 13.2$  min.

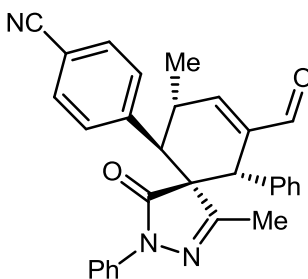

**7c:** White powder.  $^1\text{H NMR}$  ( $\text{CDCl}_3$ , 400 MHz)  $\delta$  (ppm): 0.94 (s, 3H), 1.20-1.19 (d,  $J = 7.2$  Hz, 3H), 3.15-3.18 (d,  $J = 10.4$  Hz, 1H), 3.52-3.47 (m, 1H), 4.20 (s, 1H), 7.66-7.14 (m, 13H), 7.76-7.74 (d,  $J = 8.0$  Hz, 2H), 9.51 (s, 1H).  $^{13}\text{C NMR}$  ( $\text{CDCl}_3$ , 100 MHz)  $\delta$  (ppm): 15.9, 18.6, 34.5, 45.3, 47.4, 60.3, 112.4, 119.4, 120.9, 125.8, 126.0, 127.6, 128.7, 129.4, 129.7, 130.3, 131.9, 132.7, 132.8, 133.7, 137.4, 137.9, 138.5, 144.2, 146.7, 148.3, 154.9, 160.9, 173.8, 192.3. **IR** ( $\nu_{\text{max}}$ ,  $\text{cm}^{-1}$ ): 555, 579, 628, 670, 691, 756, 793, 818, 872, 893, 921, 1017, 1091, 1128, 1160, 1292, 1391, 1452, 1485, 1494, 1513, 1597, 1691, 2228, 2922. **Mp:** 104-108°C. **HRMS (ESI):**

calcd. for  $[M+H]^+$  ( $C_{30}H_{26}N_3O_2$ ) requires 460.2020, found 460.2034. **HPLC** (Chiralpak IC, *n*-hexane: *i*-PrOH = 90:10,  $\lambda$  = 220 nm, 1.0 mL/min):  $t_R$  = 11.7, 16.7 min.

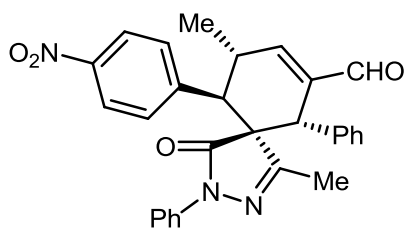

**7d:** Yellow oil.  $^1H$  NMR (400 MHz,  $CDCl_3$ ):  $\delta$  (ppm) = 0.95 (s, 3H), 1.20 (d,  $J$ =7.2 Hz, 3H), 3.23 (d,  $J$ =10.4 Hz, 1H), 3.46-3.57 (m, 1H), 4.21 (s, 1H), 7.10-7.50 (m, 6H), 7.70-7.77 (m, 4H), 8.03-8.07 (m, 2H), 8.07-8.11 (m, 1H), 8.18-8.23 (m, 2H), 9.50 (s, 1H).  $^{13}C$  NMR (100 MHz,  $CDCl_3$ ):  $\delta$  (ppm) = 15.6, 18.3, 34.3, 45.0, 46.9, 60.1, 119.1, 120.6, 123.8, 124.0, 125.8, 127.4, 128.4, 128.4, 128.7, 128.9, 129.0, 129.5, 129.7, 130.1, 131.7, 146.0, 147.6, 154.5, 160.7, 170.1, 173.5, 192.0. **IR** ( $\nu_{max}$ ,  $cm^{-1}$ ): 694, 756, 798, 896, 931, 1132, 1282, 1358, 1372, 1438, 1476, 1492, 1512, 1532, 1602, 1680, 2954. **HRMS (ESI):** calcd. for  $[M+H]^+$  ( $C_{29}H_{26}N_3O_4$ ) requires 480.1918, found 480.1919. **HPLC** (Chiralpak IB, *n*-hexane: *i*-PrOH = 90:10,  $\lambda$ =254 nm, 1.0 mL/min):  $t_R$  = 14.0, 19.4 min.  $[\alpha]_D^{25}$  = -9.5 ( $c$ =1.0,  $CHCl_3$ , ee > 99%, (*R*-Cat.).

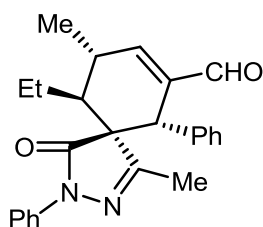

**7e:** Yellow oil.  $^1H$  NMR (300 MHz,  $CDCl_3$ ):  $\delta$  (ppm) = 0.85 (t,  $J$ =7.6 Hz, 3H), 1.12 (s, 3H), 1.46 (d,  $J$ =7.3 Hz, 3H), 1.97-2.21 (m, 3H), 3.10-3.21 (m, 1H), 4.00 (s, 1H), 7.00-7.05 (m, 2H), 7.15-7.20 (m, 1H), 7.26-7.42 (m, 6H), 7.85-7.90 (m, 2H), 9.43 (s, 1H).  $^{13}C$  NMR (100 MHz,  $CDCl_3$ ):  $\delta$  (ppm) = 11.4, 15.5, 19.3, 23.0, 32.4, 39.1, 44.9, 59.9, 118.8, 125.0, 127.6, 128.0, 128.8, 131.7, 131.7, 136.8, 138.3, 156.5, 162.4, 192.2. **IR** ( $\nu_{max}$ ,  $cm^{-1}$ ): 576, 638, 676, 828, 874, 899, 921, 1017, 1126, 1161, 1282, 1372, 1441, 1483, 1494, 1512, 1599, 1691, 2925. **HRMS (ESI):** calcd. for  $[M+H]^+$  ( $C_{25}H_{27}N_2O_2$ ) requires 387.2067, found 387.2067. **HPLC** (Chiralpak IB, *n*-hexane: *i*-PrOH = 90:10,  $\lambda$ =254 nm, 1.0 mL/min):  $t_R$  = 6.7, 7.6 min.  $[\alpha]_D^{25}$  = -111.1 ( $c$ =0.6,  $CHCl_3$ , ee > 99%, (*S*-Cat.).

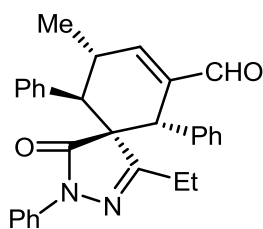

**7f:** Yellow oil.  $^1H$  NMR (300 MHz,  $CDCl_3$ ):  $\delta$  (ppm) = 9.48 (s, 1H), 8.10-7.00 (m, 16 H), 4.14 (s, 1H), 3.51-3.43 (m, 1H), 3.09 (d,  $J$ =10.4 Hz, 1H), 1.18 (d,  $J$ =7.3 Hz, 3H), 0.95 (q,  $J$ =7.1 Hz, 2H), 0.57 (t,  $J$ =7.1 Hz, 3H).  $^{13}C$  NMR (100 MHz,  $CDCl_3$ ):  $\delta$  (ppm) = 13.6,

18.3, 22.4, 34.8, 45.3, 47.1, 60.5, 119.3, 120.7, 125.1, 125.4, 126.8, 127.6, 127.8, 128.1, 128.4, 128.8, 128.9, 129.1, 130.1, 131.6, 133.4, 138.3, 142.2, 152.3, 156.0. 165.3, 170.3, 174.3, 192.4. **IR** ( $\nu_{\max}$ ,  $\text{cm}^{-1}$ ): 580, 801, 838, 877, 893, 921, 1021, 1128, 1161, 1282, 1374, 1446, 1485, 1494, 1502, 1589, 1689, 2925, 3021. **HRMS (ESI)**: calcd. for  $[\text{M}+\text{H}]^+$  ( $\text{C}_{30}\text{H}_{29}\text{N}_2\text{O}_2$ ) requires 449.2224, found 449.2217. **HPLC** (Chiralpak IB, *n*-hexane: *i*-PrOH = 90:10,  $\lambda=254$  nm, 1.0 mL/min):  $t_{\text{R}} = 6.5, 9.0$  min.  $[\alpha]_{\text{D}}^{25} = 4.3$  ( $c=1.5$ ,  $\text{CHCl}_3$ , ee > 99%, (*S*)-Cat.).

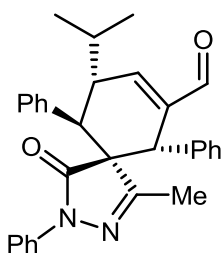

**7i**: White powder.  **$^1\text{H NMR}$  ( $\text{CDCl}_3$ , 400 MHz)  $\delta$  (ppm)**: 0.95 (s, 3H), 1.09-1.07 (d,  $J = 6.8$  Hz, 3H), 1.17-1.15 (d,  $J = 7.2$  Hz, 3H), 1.75-1.66 (m, 1H), 3.39-3.36 (d,  $J = 10.8$  Hz, 1H) 3.51-3.47 (m, 1H), 4.15 (s, 1H), 7.40-7.09 (m, 14H), 7.76-7.74 (d,  $J = 7.6$  Hz, 2H), 9.54 (s, 1H).  **$^{13}\text{C NMR}$  ( $\text{CDCl}_3$ , 100 MHz)  $\delta$  (ppm)**: 15.9, 17.3, 21.7, 31.1, 42.8, 44.7, 45.3, 60.7, 119.5, 120.6, 125.4, 125.6, 127.4, 127.5, 128.1, 128.3, 128.6, 128.7, 128.8, 129.0, 129.3, 131.9, 137.9, 138.4, 138.8, 139.7, 151.9, 161.7, 174.5, 192.4. **IR** ( $\nu_{\max}$ ,  $\text{cm}^{-1}$ ): 576, 648, 690, 696, 752, 867, 921, 1013, 1112, 1156, 1281, 1379, 1456, 1484, 1513, 1594, 1692, 2929, 3034. **HRMS (ESI)**: calcd. for  $[\text{M}+\text{H}]^+$  ( $\text{C}_{31}\text{H}_{31}\text{N}_2\text{O}_2$ ) requires 463.2380, found 463.2384. **HPLC** (Chiralpak IB, *n*-hexane: *i*-PrOH= 91:9,  $\lambda= 254$  nm, 1.0 mL/min):  $t_{\text{R}}= 5.8, 8.9$  min.

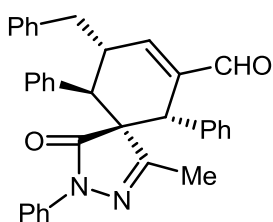

**7j**: Yellow oil.  **$^1\text{H NMR}$  (400 MHz,  $\text{CDCl}_3$ ):  $\delta$  (ppm)** = 0.95 (s, 3H), 2.56 (dd,  $J_1=8.2$  Hz,  $J_2=13.7$  Hz, 1H), 3.06 (dd,  $J_1=4.0$  Hz,  $J_2=13.7$  Hz, 1H), 3.27 (d,  $J=10.6$  Hz, 1H), 3.80-3.88 (m, 1H), 4.08 (s, 1H), 6.90-7.50 (m, 15H), 7.58-7.63 (m, 1H), 7.69-7.64 (m, 2H), 8.09-8.14 (m, 3H), 9.45 (s, 1H).  **$^{13}\text{C NMR}$  (100 MHz,  $\text{CDCl}_3$ ):  $\delta$  (ppm)** = 15.2, 37.3, 40.9, 43.6, 44.8, 60.6, 119.3, 120.4, 125.2, 126.9, 127.6, 128.0, 128.1, 128.3, 128.4, 128.6, 128.6, 128.7, 128.8, 128.9, 129.0, 129.4, 129.5, 129.7, 130.2, 131.6, 133.6, 137.7, 137.8, 138.1, 153.3, 161.3, 171.3, 173.9, 192.1. **IR** ( $\nu_{\max}$ ,  $\text{cm}^{-1}$ ): 580, 638, 676, 883, 1027, 1156, 1279, 1324, 1443, 1492, 1500, 1605, 1694, 2929, 3034. **HRMS (ESI)**: calcd. for  $[\text{M}+\text{H}]^+$  ( $\text{C}_{35}\text{H}_{31}\text{N}_2\text{O}_2$ ) requires 511.2380, found 511.2378. **HPLC** (Chiralpak IB, *n*-hexane:

*i*-PrOH = 90:10,  $\lambda$ =220 nm, 1.0 mL/min):  $t_R$  = 7.6, 22.0 min.  $[\alpha]_D^{25}$  = 18.0 ( $c$ =1.0, CHCl<sub>3</sub>, ee = 98%, (*S*)-Cat.).

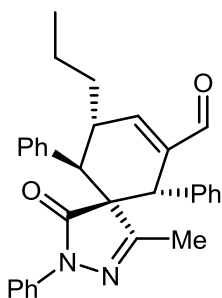

**7k:** White powder. <sup>1</sup>H NMR (CDCl<sub>3</sub>, 400 MHz)  $\delta$  (ppm): 0.88-0.94 (m, 7H), 0.95 (s, 3H), 3.23-3.20 (d,  $J$  = 10.8 Hz, 1H), 3.48-3.42 (m, 1H), 4.15 (s, 1H), 7.45-7.078 (m, 14H), 7.75-7.73 (d,  $J$  = 7.6 Hz, 2H), 9.52 (s, 1H). <sup>13</sup>C NMR (CDCl<sub>3</sub>, 100 MHz)  $\delta$  (ppm): 14.4, 15.9, 19.7, 22.9, 39.0, 45.0, 45.3, 60.6, 119.5, 120.5, 125.4, 125.8, 127.8, 128.1, 128.3, 128.4, 128.7, 128.8, 129.0, 129.2, 129.5, 131.9, 137.9, 138.0, 138.4, 138.6, 154.5, 161.7, 174.3, 192.5. IR ( $\nu_{max}$ , cm<sup>-1</sup>): 578, 641, 667, 889, 1034, 1162, 1280, 1327, 1448, 1498, 1502, 1608, 1692, 2930, 3031. HRMS (ESI): calcd. for [M+H]<sup>+</sup> (C<sub>31</sub>H<sub>31</sub>N<sub>2</sub>O<sub>2</sub>) requires 463.2380, found 463.2382. HPLC (Chiralpak IC, *n*-hexane: *i*-PrOH = 90:10,  $\lambda$  = 254 nm, 1.0 mL/min):  $t_R$  = 13.8, 18.7 min.

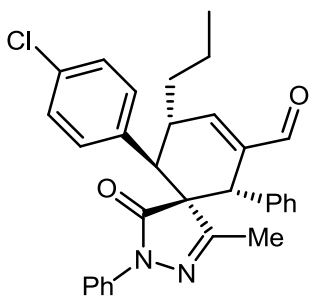

**7m:** White scum. <sup>1</sup>H NMR (CDCl<sub>3</sub>, 400 MHz)  $\delta$  (ppm): 0.93-0.86 (m, 7H), 0.95 (s, 3H), 3.22-3.19 (d,  $J$  = 10.4 Hz, 1H), 3.43-3.37 (m, 1H), 4.15 (s, 1H), 7.52-7.00 (m, 13H), 7.76-7.74 (d,  $J$  = 7.6 Hz, 2H), 9.51 (s, 1H). <sup>13</sup>C NMR (CDCl<sub>3</sub>, 100 MHz)  $\delta$  (ppm): 13.5, 14.4, 19.7, 29.9, 39.0, 44.4, 45.2, 60.5, 119.4, 121.3, 125.3, 126.3, 127.7, 128.2, 128.6, 128.8, 129.0, 129.1, 129.6, 131.1, 131.5, 135.1, 137.0, 137.7, 138.4, 139.5, 145.4, 150.9, 161.4, 174.1, 192.5. IR ( $\nu_{max}$ , cm<sup>-1</sup>): 578, 625, 682, 698, 758, 796, 818, 867, 891, 1120, 1161, 1276, 1345, 1444, 1478, 1485, 1517, 1584, 1686, 2926, 3023. HRMS (ESI): calcd. for [M+H]<sup>+</sup> (C<sub>31</sub>H<sub>30</sub>ClN<sub>2</sub>O<sub>2</sub>) requires 497.1990, found 497.1990. HPLC (Chiralpak IA, *n*-hexane: *i*-PrOH = 90:10,  $\lambda$  = 254 nm, 1.0 mL/min):  $t_R$  = 7.6, 8.7 min.

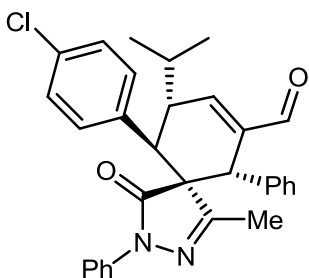

**7n:** White scum. <sup>1</sup>H NMR (CDCl<sub>3</sub>, 400 MHz)  $\delta$  (ppm): 0.95 (s, 3H), 1.08-1.07 (d,  $J$  = 6.8 Hz, 3H), 1.17-1.15 (d,  $J$  = 7.2 Hz, 3H), 1.67-1.62 (m, 1H), 3.38-3.35 (d,  $J$  = 11.2 Hz, 1H), 3.46-3.42 (m, 1H), 4.15 (s, 1H), 7.41-7.14 (m, 13H), 7.77-7.75 (d,  $J$  = 7.6 Hz, 2H), 9.53 (s, 1H). <sup>13</sup>C NMR (CDCl<sub>3</sub>, 100 MHz)  $\delta$  (ppm): 15.9, 17.3, 21.7, 27.4, 42.3, 44.7, 45.3, 60.6, 119.4, 120.5, 125.6, 127.5, 128.4, 128.8, 129.1,

129.6, 131.9, 134.0, 137.0, 137.8, 138.7, 139.6, 151.4, 161.4, 174.2, 192.3. **Mp:** 94-96°C (decomp.). **IR** ( $\nu_{\max}$ ,  $\text{cm}^{-1}$ ): 576, 622, 672, 698, 758, 796, 818, 867, 891, 1113, 1169, 1278, 1355, 1478, 1485, 1517, 1582, 1685, 2925, 3033. **HRMS (ESI):** calcd. for  $[\text{M}+\text{Na}]^+$  ( $\text{C}_{31}\text{H}_{29}\text{ClN}_2\text{NaO}_2$ ) requires 519.1810, found 519.1806. **HPLC** (Chiralpak IA, *n*-hexane: *i*-PrOH= 90:10,  $\lambda$ = 254 nm, 1.0 mL/min):  $t_{\text{R}}$ = 7.0, 7.7 min.

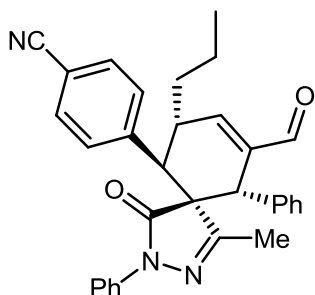

**7o:** White powder.  **$^1\text{H NMR}$  ( $\text{CDCl}_3$ , 400 MHz)  $\delta$  (ppm):** 0.93-0.86 (m, 7H), 0.95 (s, 3H), 3.31-3.28 (d,  $J$ = 10.4 Hz, 1H), 3.48-3.41 (m, 1H), 4.18 (s, 1H), 7.52-7.12 (m, 13H), 7.74-7.72 (d,  $J$ = 8.0 Hz, 2H), 9.52 (s, 1H).  **$^{13}\text{C NMR}$  ( $\text{CDCl}_3$ , 100 MHz)  $\delta$  (ppm):** 14.3, 15.8, 19.7, 31.7, 38.7, 39.8, 45.5, 60.4, 112.4, 119.4, 125.5, 125.8, 127.8, 128.1, 128.3, 128.6, 128.9, 129.0, 129.1, 130.3, 132.8, 133.1, 138.5, 138.7, 139.5, 144.2, 150.5, 153.2, 160.9, 161.7, 174.2, 192.3. **Mp:** 74-77°C (decomp.). **IR** ( $\nu_{\max}$ ,  $\text{cm}^{-1}$ ): 693, 756, 793, 818, 893, 921, 1088, 1118, 1161, 1291, 1391, 1452, 1485, 1494, 1514, 1598, 1699, 2223, 2922, 3030. **HRMS (ESI):** calcd. for  $[\text{M}+\text{H}]^+$  ( $\text{C}_{32}\text{H}_{30}\text{N}_3\text{O}_2$ ) requires 488.2333, found 488.2335. **HPLC** (Chiralpak IC, *n*-hexane: *i*-PrOH= 90:10,  $\lambda$ = 254 nm, 1.0 mL/min):  $t_{\text{R}}$ = 17.7, 19.2 min.

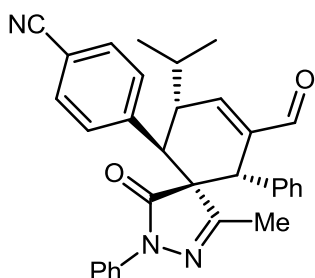

**7p:** White scum.  **$^1\text{H NMR}$  ( $\text{CDCl}_3$ , 400 MHz)  $\delta$  (ppm):** 0.94 (s, 3H), 1.10-1.08 (d,  $J$ = 7.2 Hz, 3H), 1.18-1.16 (d,  $J$ = 6.8 Hz, 3H), 1.72-1.66 (m, 1H), 3.49-3.47 (m, 2H), 4.18 (s, 1H), 7.50-7.14 (m, 13H), 7.74-7.72 (d,  $J$ = 7.6 Hz, 2H), 9.54 (s, 1H).  **$^{13}\text{C NMR}$  ( $\text{CDCl}_3$ , 100 MHz)  $\delta$  (ppm):** 17.3, 21.6, 27.6, 31.1, 43.0, 44.4, 45.1, 60.4, 112.3, 118.3, 119.5, 120.3, 125.8, 128.7, 128.9, 129.4, 129.7, 130.9, 131.3, 131.9, 132.1, 133.8, 136.9, 137.6, 138.4, 139.6, 143.5, 144.3, 150.6, 161.0, 173.9, 192.2. **IR** ( $\nu_{\max}$ ,  $\text{cm}^{-1}$ ): 580, 629, 690, 756, , 893, 921, 1017, 1091, 1128, 1160, 1292, 1391, 1452, 1485, 1491, 1517, 1589, 1699, 2221, 2912, 3045. **HRMS (ESI):** calcd. for  $[\text{M}+\text{H}]^+$  ( $\text{C}_{32}\text{H}_{30}\text{N}_3\text{O}_2$ ) requires 488.2333, found 488.2328. **HPLC** (Chiralpak IC, *n*-hexane: *i*-PrOH= 90:10,  $\lambda$ = 210 nm, 1.0 mL/min):  $t_{\text{R}}$ = 18.7, 20.5 min.

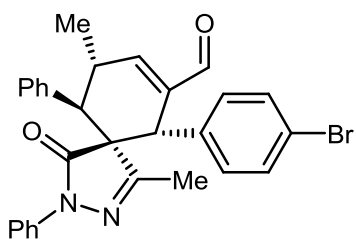

**7q:** White powder.  $^1\text{H NMR}$  ( $\text{CDCl}_3$ , 300 MHz)  $\delta$  (ppm): 1.03 (s, 3H), 1.20-1.18 (d,  $J=7.5$  Hz, 3H), 3.02-2.98 (d,  $J=10.2$  Hz, 1H), 3.53-3.47 (m, 1H), 4.12 (s, 1H), 7.55-7.01 (m, 13H), 7.75-7.73 (d,  $J=8.4$  Hz, 2H), 9.50 (s, 1H).  $^{13}\text{C NMR}$  ( $\text{CDCl}_3$ , 100 MHz)  $\delta$  (ppm): 16.2, 18.6, 34.8, 44.8, 47.2, 60.3, 119.5, 122.5, 125.6, 128.2, 128.3, 129.0, 129.1, 129.4, 132.0, 132.6, 133.5, 137.1, 137.6, 137.8, 138.0, 156.5, 161.1, 174.1, 192.4. **IR** ( $\nu_{\text{max}}$ ,  $\text{cm}^{-1}$ ): 578, 632, 678, 786, 812, 847, 893, 1113, 1169, 1278, 1346, 1468, 1489, 1522, 1591, 1695, 2935, 3043 **HRMS** (ESI): calcd. for  $[\text{M}+\text{H}]^+$  ( $\text{C}_{29}\text{H}_{26}\text{BrN}_2\text{O}_2$ ) requires 513.1172, found 513.1172. **HPLC** (Chiralpak IA, *n*-hexane: *i*-PrOH= 90:10,  $\lambda=254$  nm, 1.0 mL/min):  $t_{\text{R}}=15.9, 20.4$  min.

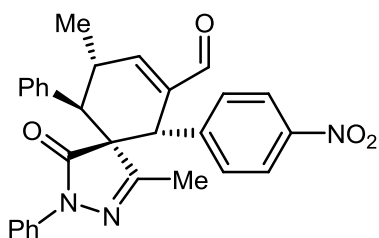

**7r:** White powder.  $^1\text{H NMR}$  ( $\text{CDCl}_3$ , 300 MHz)  $\delta$  (ppm): 0.99 (s, 3H), 1.23-1.21 (d,  $J=7.6$  Hz, 3H), 3.00-2.98 (d,  $J=10.4$  Hz, 1H), 3.58-3.52 (m, 1H), 4.25 (s, 1H), 7.75-7.07 (m, 13H), 7.75-7.73 (d,  $J=7.6$  Hz, 2H), 9.51 (s, 1H).  $^{13}\text{C NMR}$  ( $\text{CDCl}_3$ , 100 MHz)  $\delta$  (ppm): 16.2, 18.6, 34.7, 44.9, 47.4, 60.1, 119.5, 120.1, 123.8, 124.0, 124.5, 125.8, 128.1, 128.5, 128.7, 129.1, 129.2, 130.4, 132.9, 133.9, 136.6, 137.6, 146.1, 147.8, 157.2, 160.2, 170.9, 173.7, 192.2. **Mp:** 86-88°C (decomp.). **IR** ( $\nu_{\text{max}}$ ,  $\text{cm}^{-1}$ ): 576, 695, 756, 798, 895, 931, 1132, 1282, 1358, 1372, 1438, 1476, 1492, 1512, 1533, 1601, 1682, 2954, 3022. **HRMS** (ESI): calcd. for  $[\text{M}+\text{H}]^+$  ( $\text{C}_{29}\text{H}_{26}\text{N}_3\text{O}_4$ ) requires 480.1918, found 480.1916. **HPLC** (Chiralpak IA, *n*-hexane: *i*-PrOH= 90:10,  $\lambda=254$  nm, 1.0 mL/min):  $t_{\text{R}}=8.3, 11.1$  min.



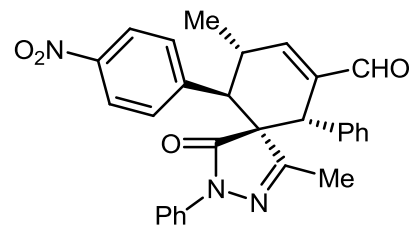

7d

<sup>1</sup>H NMR

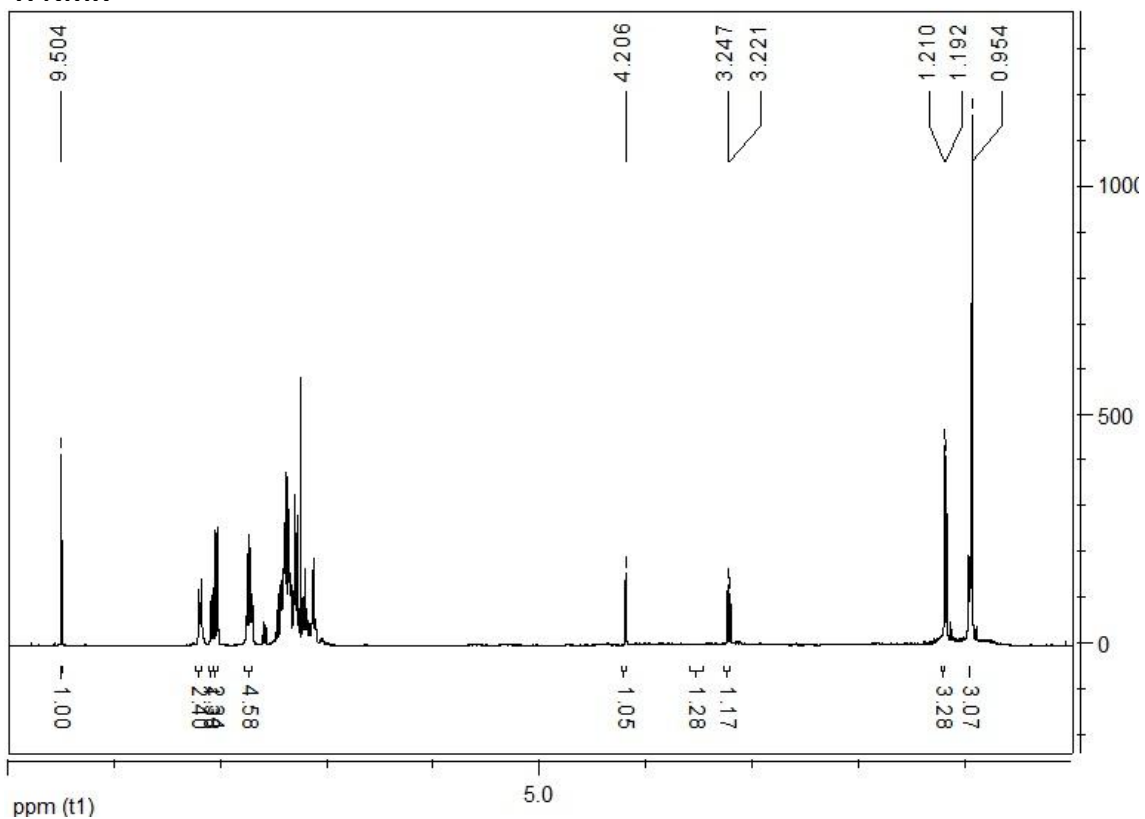

<sup>13</sup>C NMR

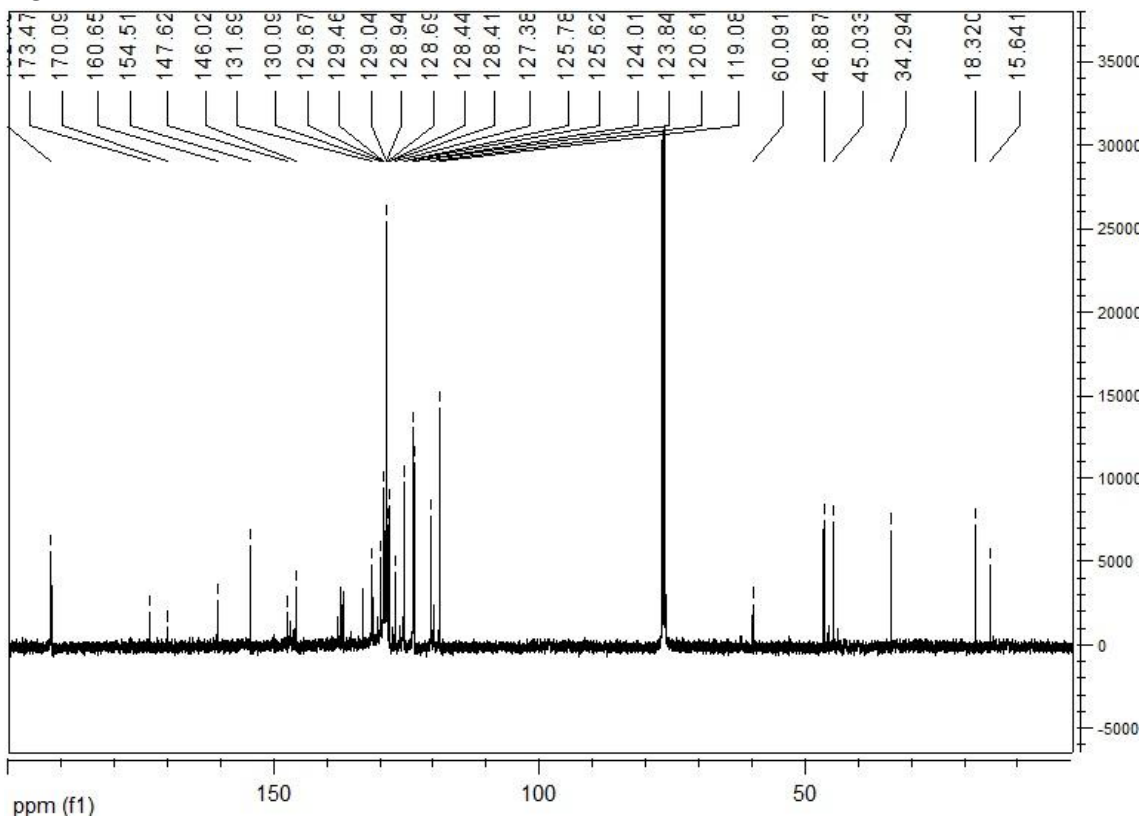

HPLC; Rac.:

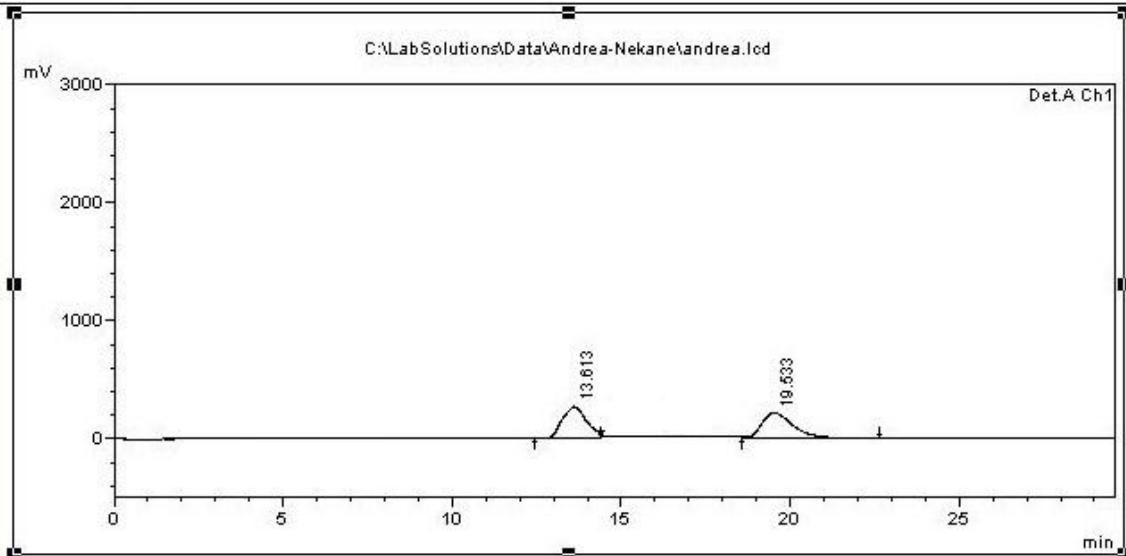

PeakTable

Detector A Ch1 254nm

| Peak# | Ret. Time | Area     | Area %  |
|-------|-----------|----------|---------|
| 1     | 13.613    | 13317897 | 48.356  |
| 2     | 19.533    | 14223551 | 51.644  |
| Total |           | 27541448 | 100.000 |

(R)-Cat.

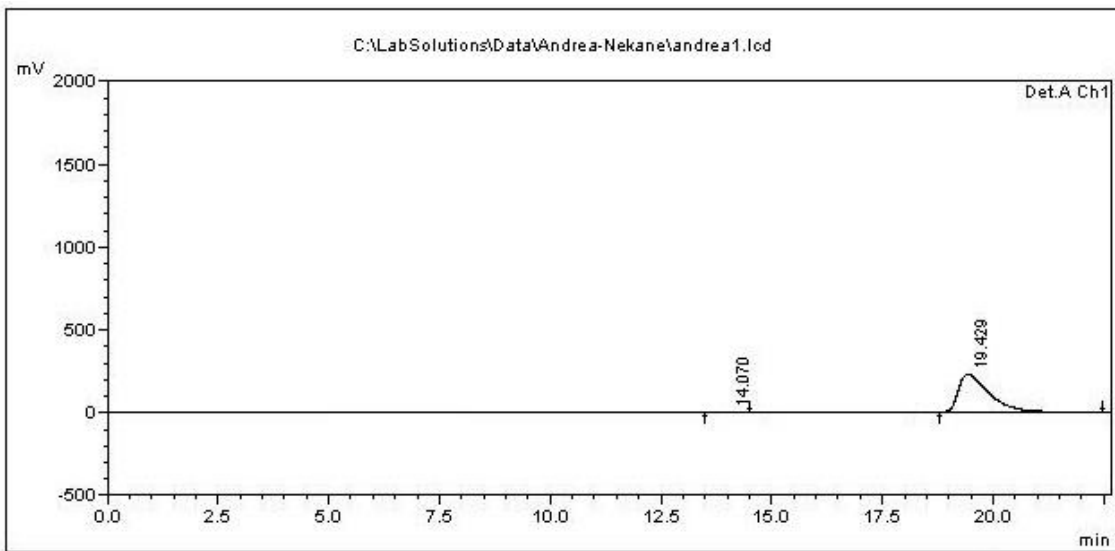

PeakTable

Detector A Ch1 254nm

| Peak# | Ret. Time | Area     | Area %  |
|-------|-----------|----------|---------|
| 1     | 14.070    | 115916   | 1.005   |
| 2     | 19.429    | 11420143 | 98.995  |
| Total |           | 11536059 | 100.000 |

(S)-Cat.

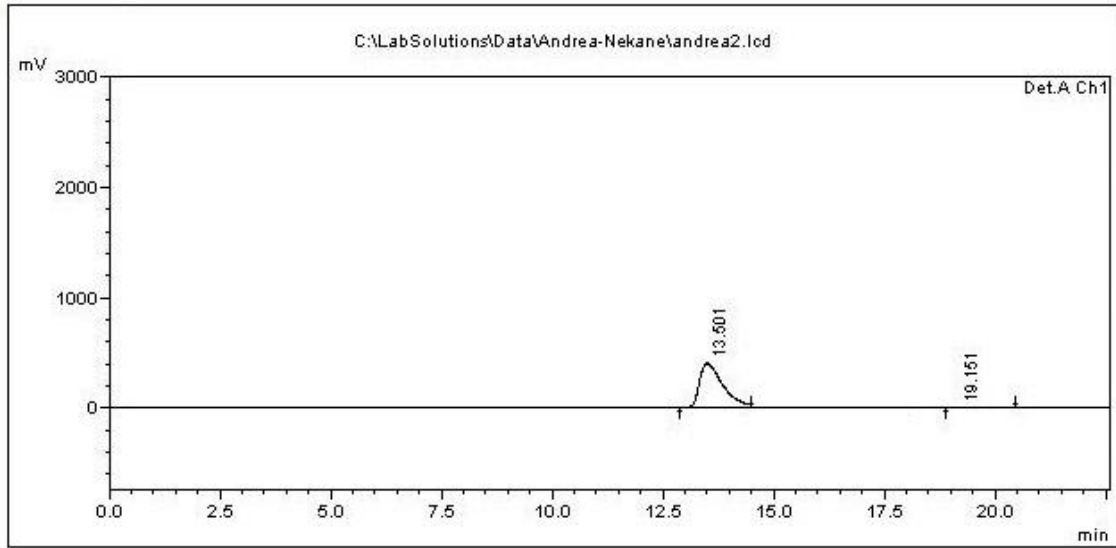

PeakTable

Detector A Ch1 254nm

| Peak# | Ret. Time | Area     | Area %  |
|-------|-----------|----------|---------|
| 1     | 13.501    | 14996319 | 99.631  |
| 2     | 19.151    | 55474    | 0.369   |
| Total |           | 15051793 | 100.000 |

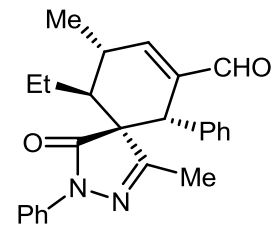

7e

<sup>1</sup>H NMR

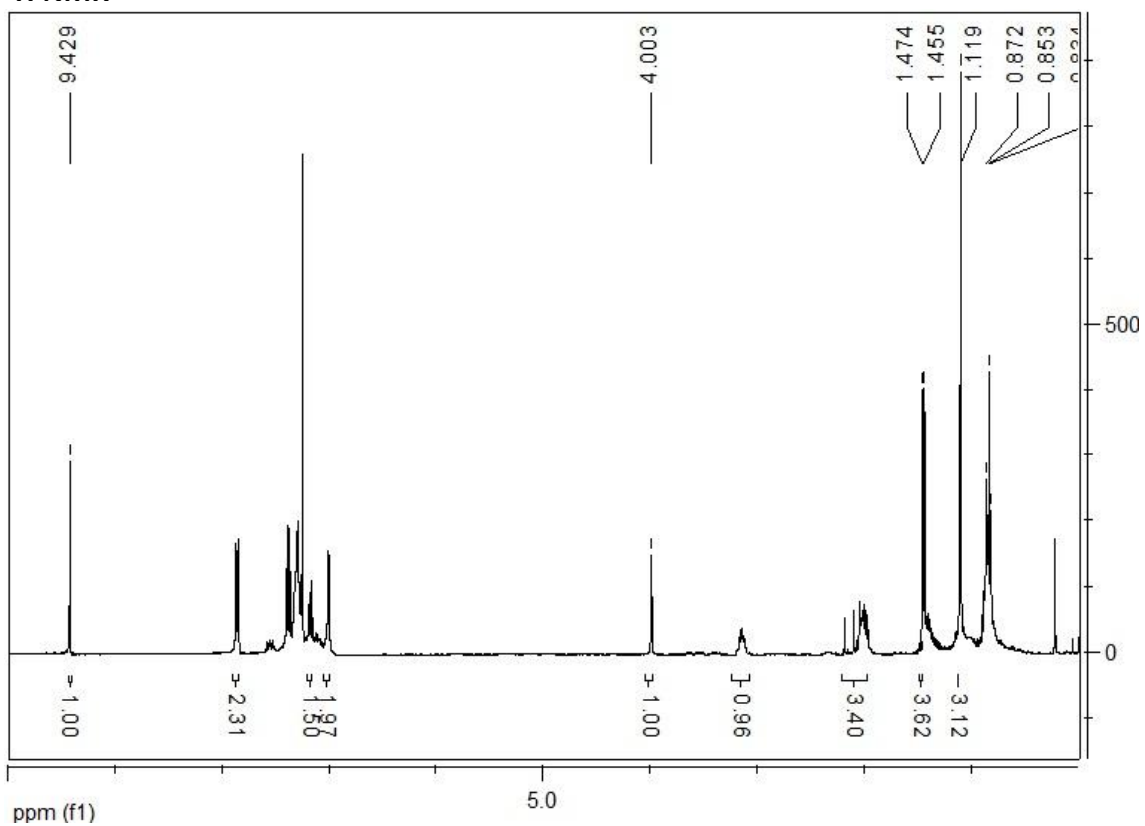

<sup>13</sup>C NMR

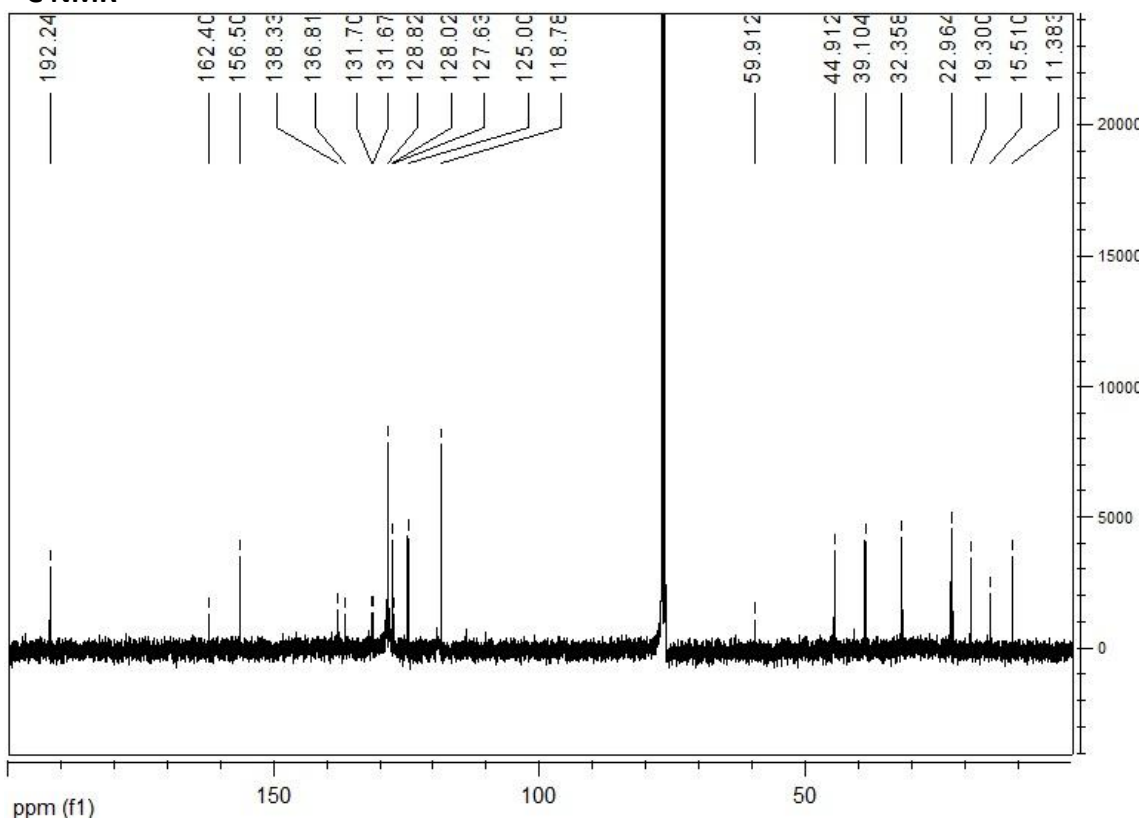

# HPLC

Rac.:

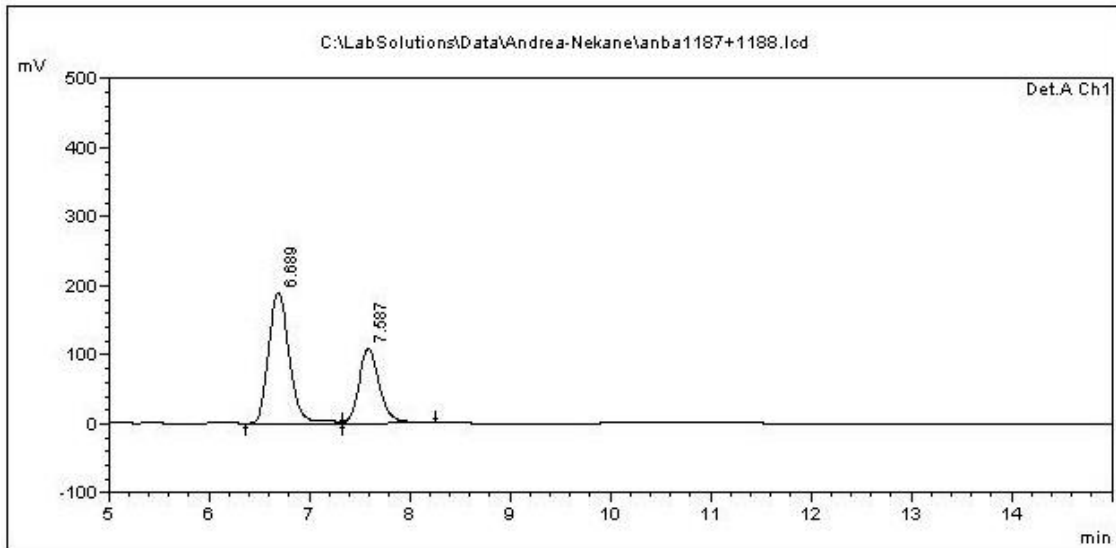

PeakTable

Detector A Ch1 254nm

| Peak# | Ret. Time | Area    | Area %  |
|-------|-----------|---------|---------|
| 1     | 6.689     | 2726525 | 64.211  |
| 2     | 7.587     | 1519684 | 35.789  |
| Total |           | 4246209 | 100.000 |

(R)-Cat.

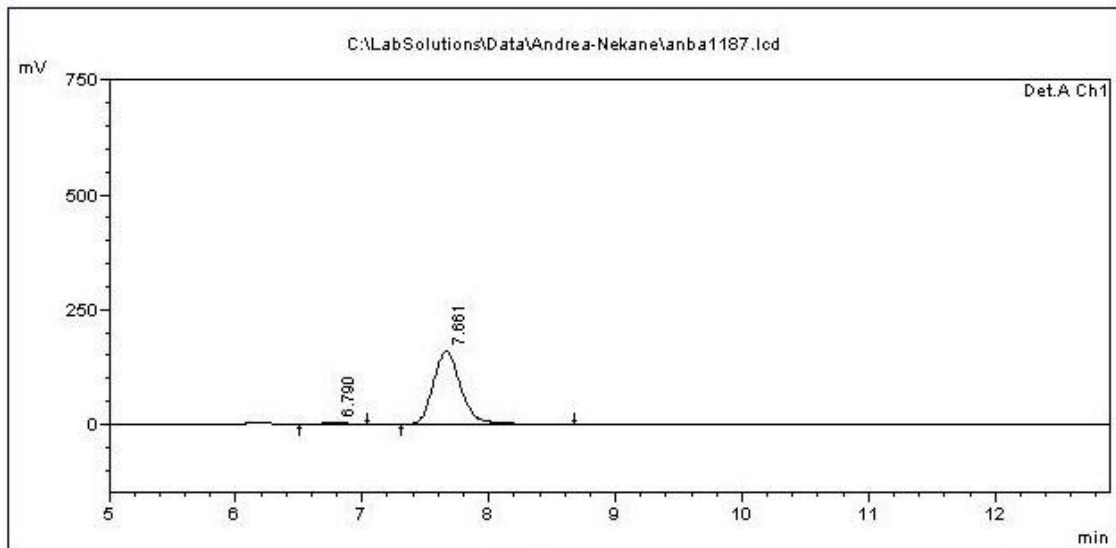

PeakTable

Detector A Ch1 254nm

| Peak# | Ret. Time | Area    | Area %  |
|-------|-----------|---------|---------|
| 1     | 6.790     | 31363   | 1.300   |
| 2     | 7.661     | 2381480 | 98.700  |
| Total |           | 2412843 | 100.000 |

(S)-Cat.

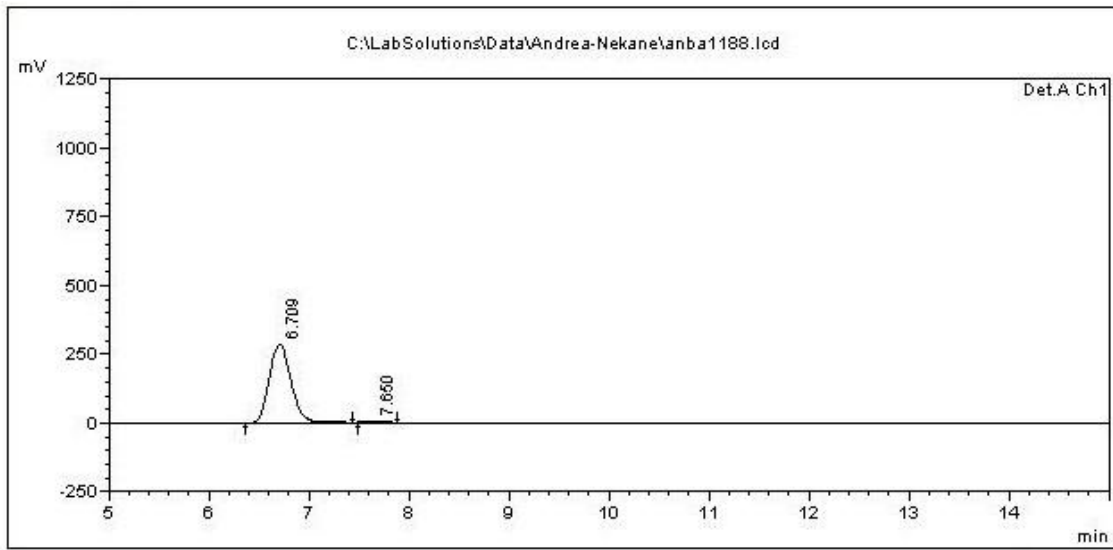

PeakTable

Detector A Ch1 254nm

| Peak# | Ret. Time | Area    | Area %  |
|-------|-----------|---------|---------|
| 1     | 6.709     | 4356112 | 98.329  |
| 2     | 7.650     | 74038   | 1.671   |
| Total |           | 4430150 | 100.000 |

7f

<sup>1</sup>H NMR

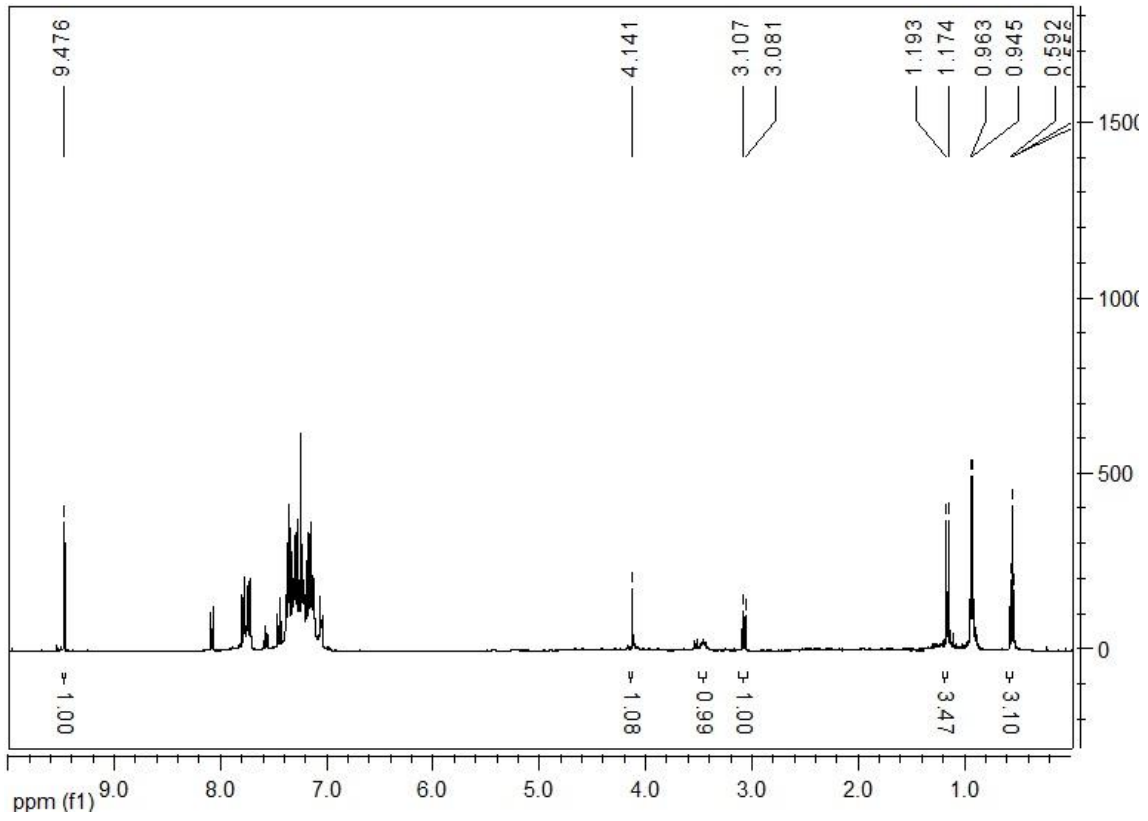

<sup>13</sup>C NMR

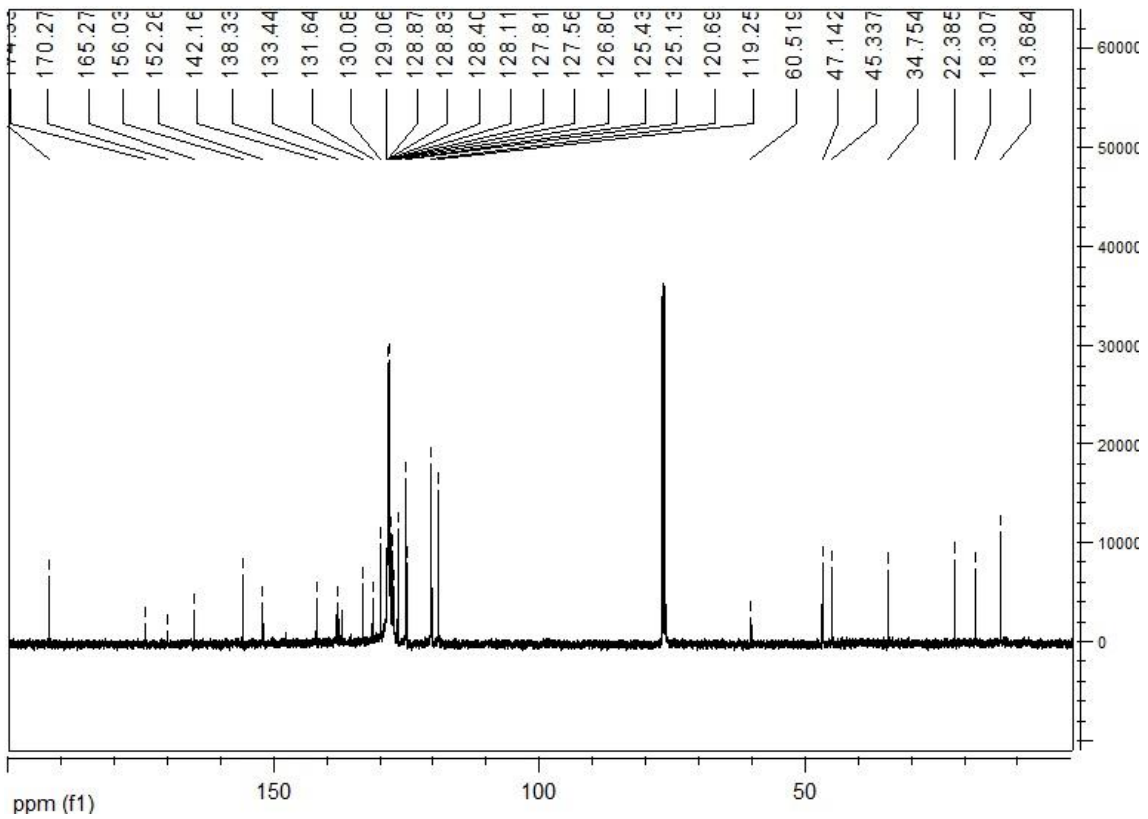

# HPLC

Rac.:

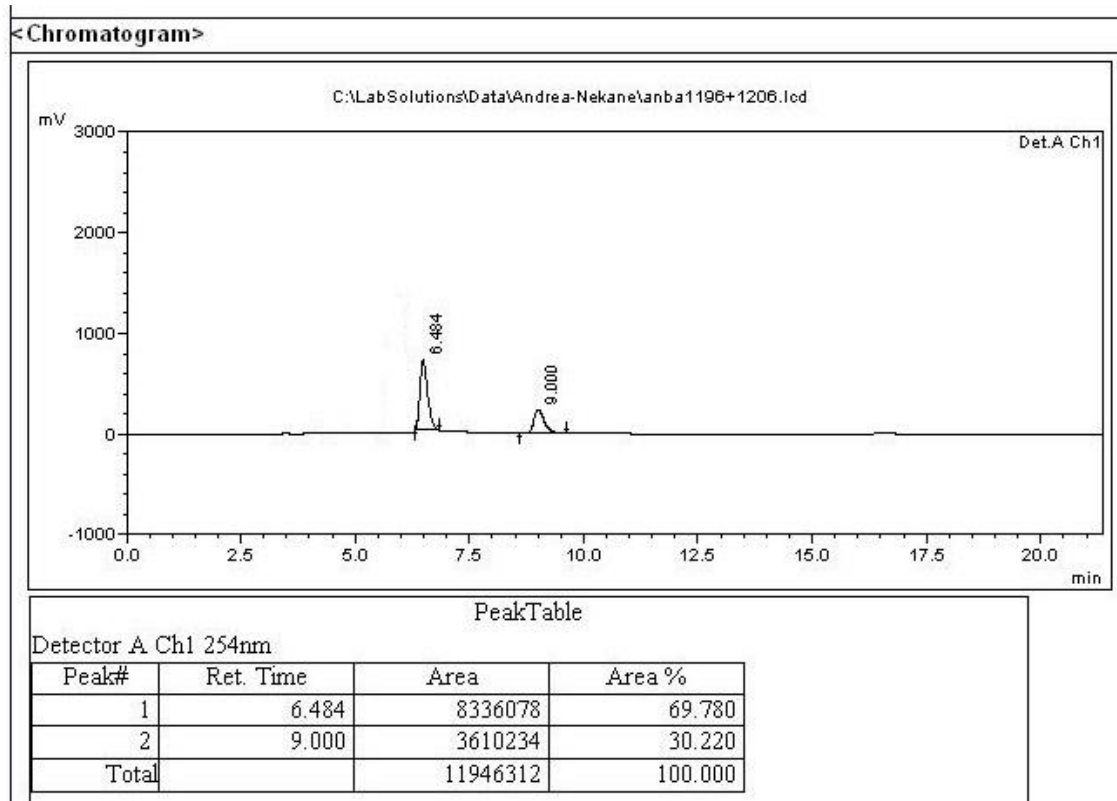

(S)-Cat.

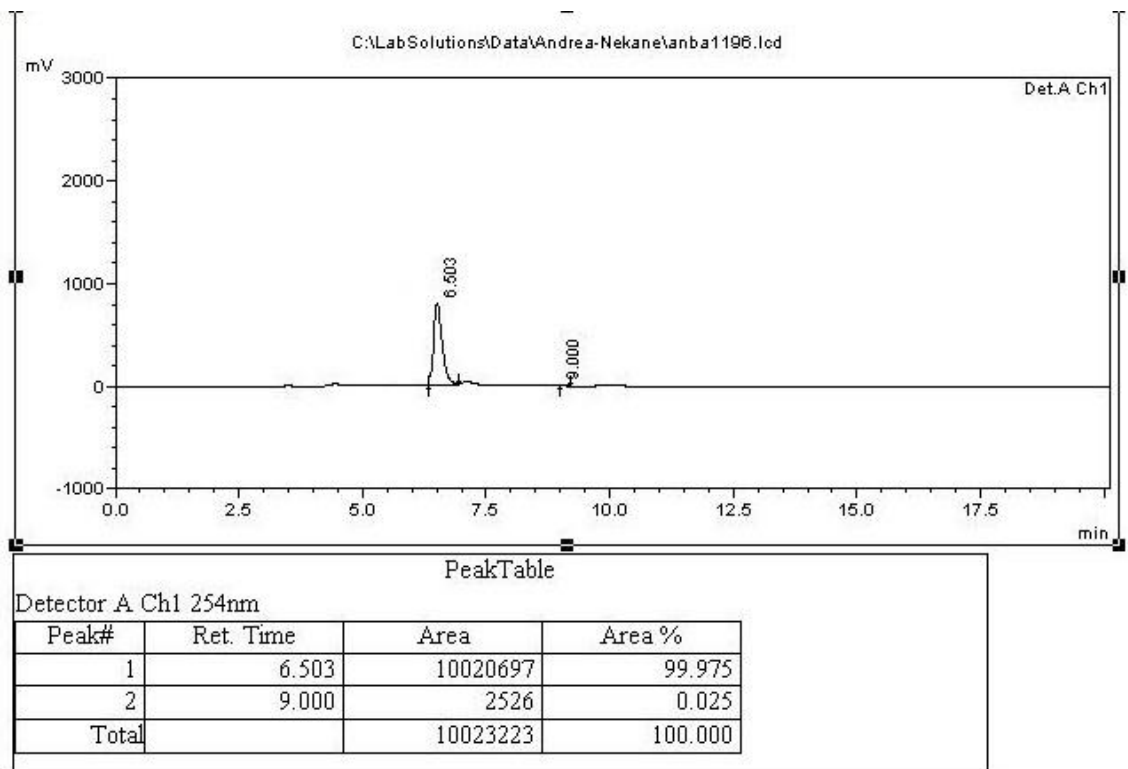



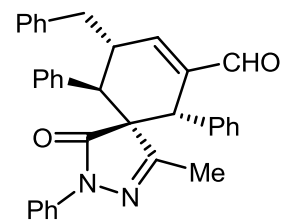

7j

<sup>1</sup>H NMR

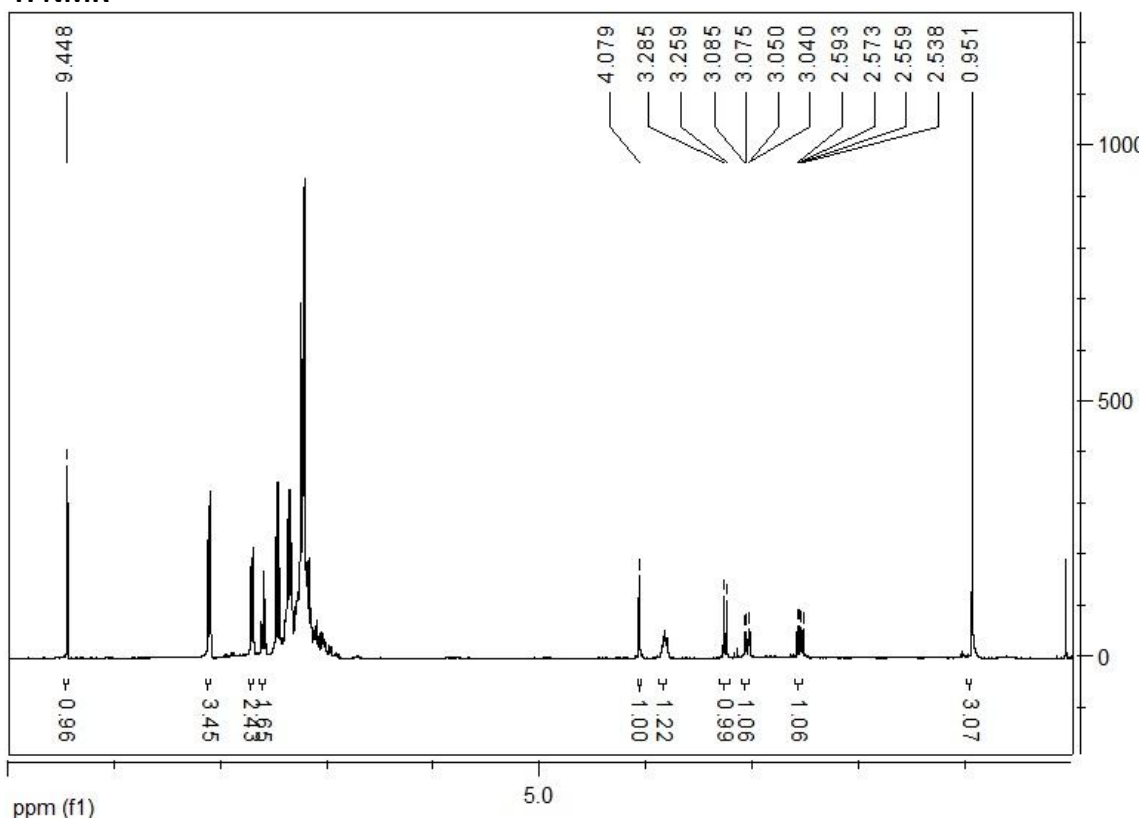

<sup>13</sup>C NMR

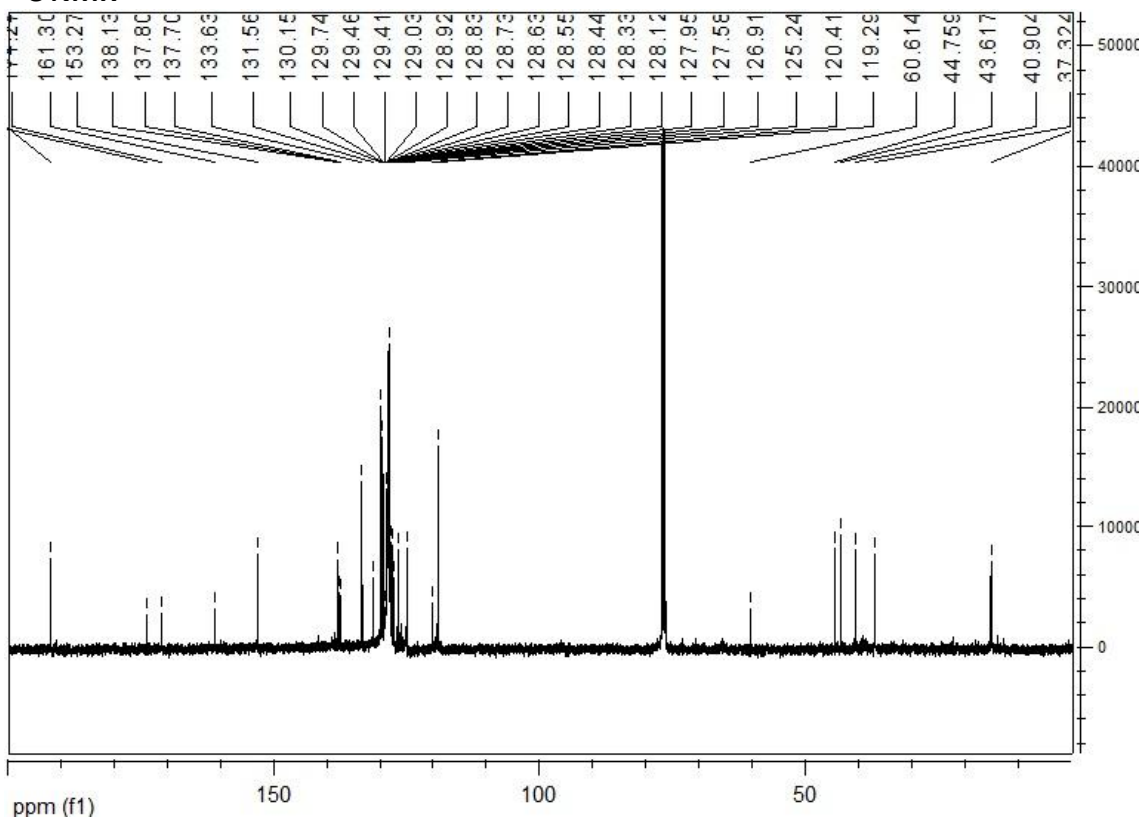

# HPLC

Rac.:

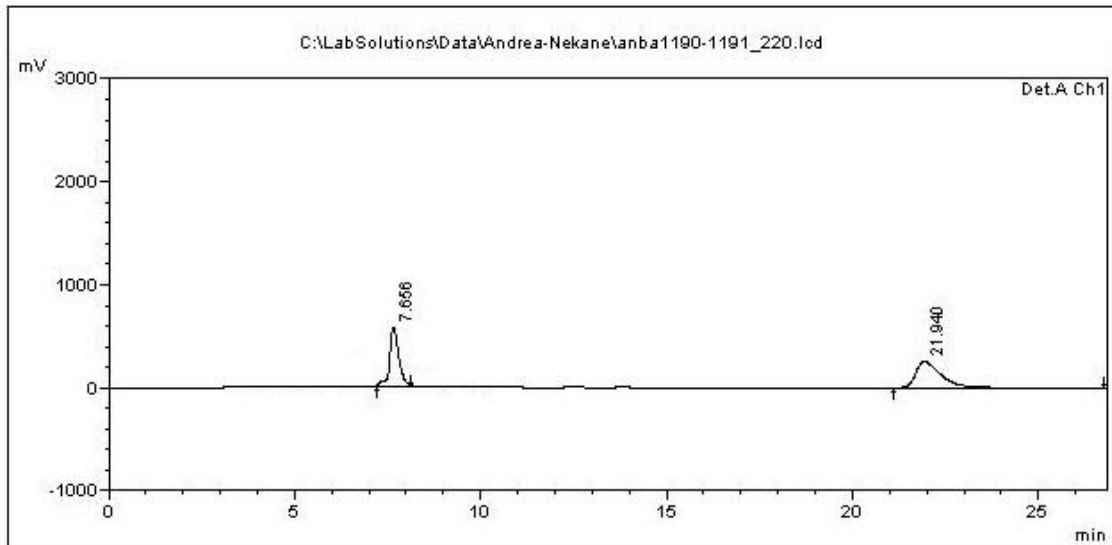

PeakTable

Detector A Ch1 220nm

| Peak# | Ret. Time | Area     | Area %  |
|-------|-----------|----------|---------|
| 1     | 7.656     | 10103927 | 46.078  |
| 2     | 21.940    | 11824099 | 53.922  |
| Total |           | 21928026 | 100.000 |

(S)-Cat.

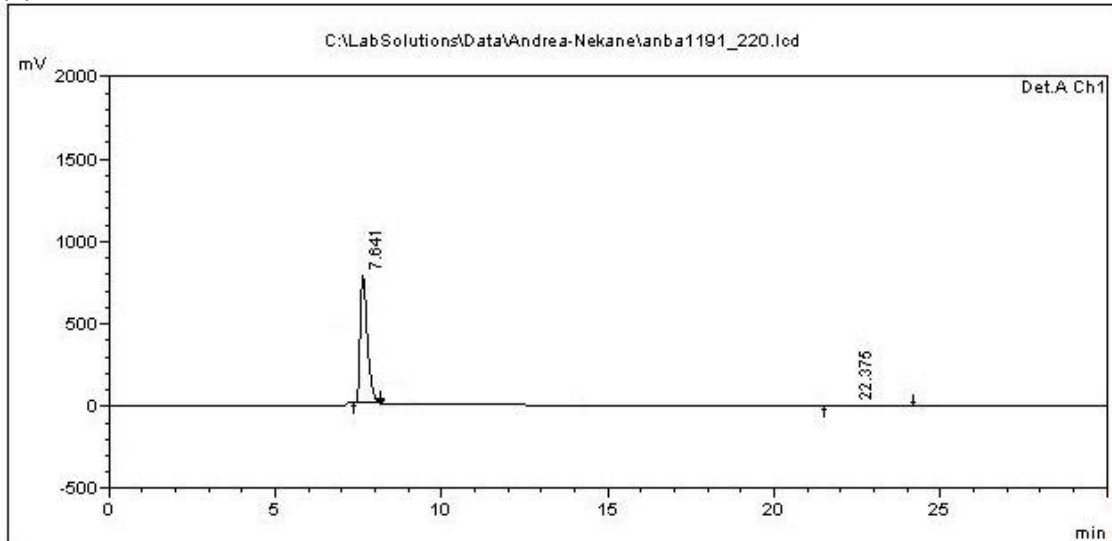

PeakTable

Detector A Ch1 220nm

| Peak# | Ret. Time | Area     | Area %  |
|-------|-----------|----------|---------|
| 1     | 7.641     | 11642891 | 98.838  |
| 2     | 22.375    | 136917   | 1.162   |
| Total |           | 11779808 | 100.000 |

7a

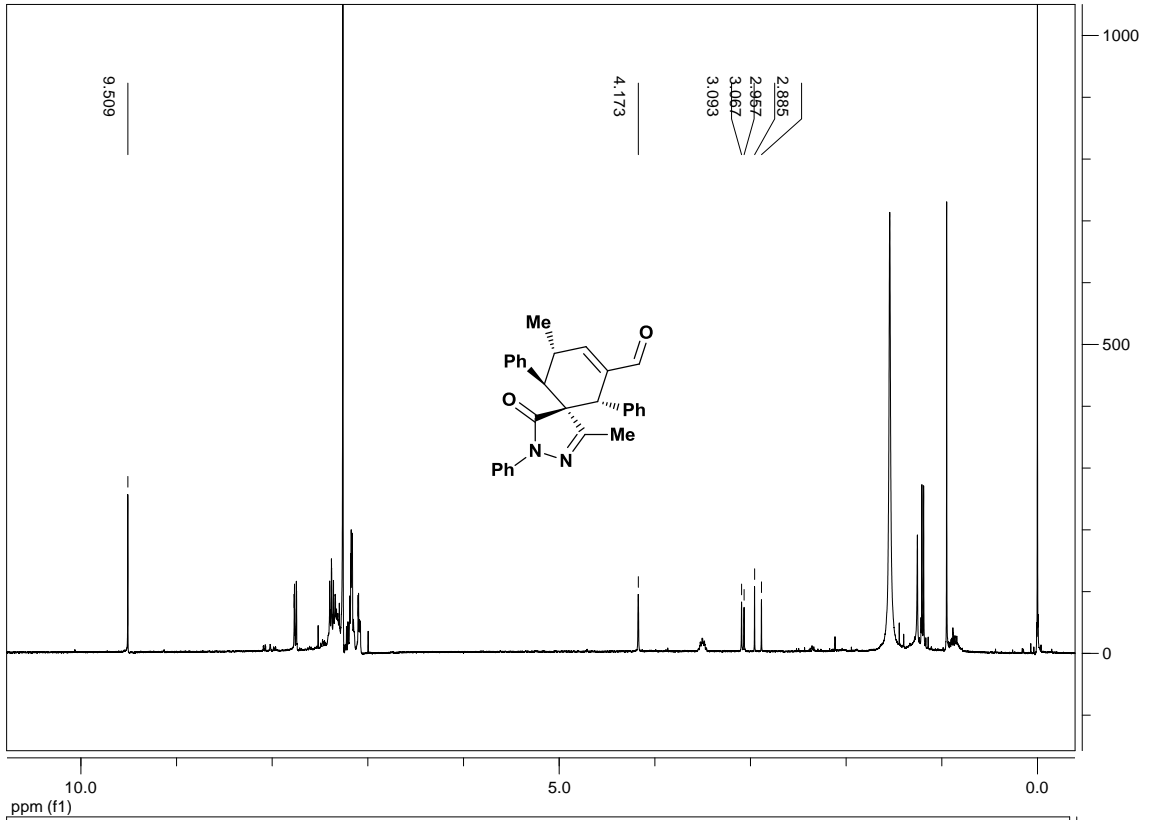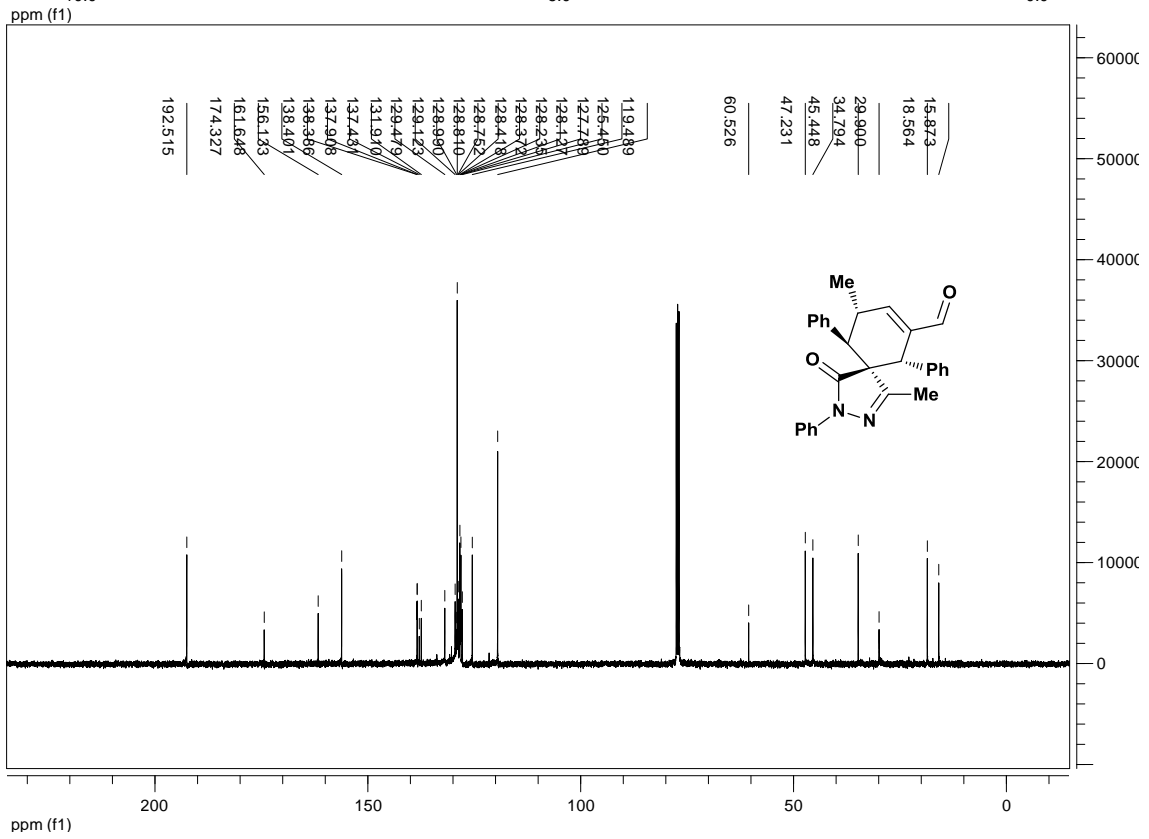

<Chromatogram>

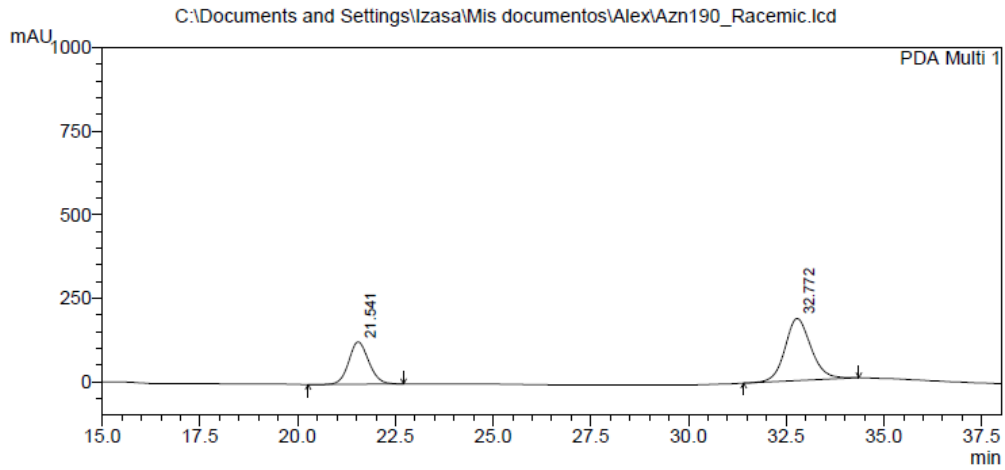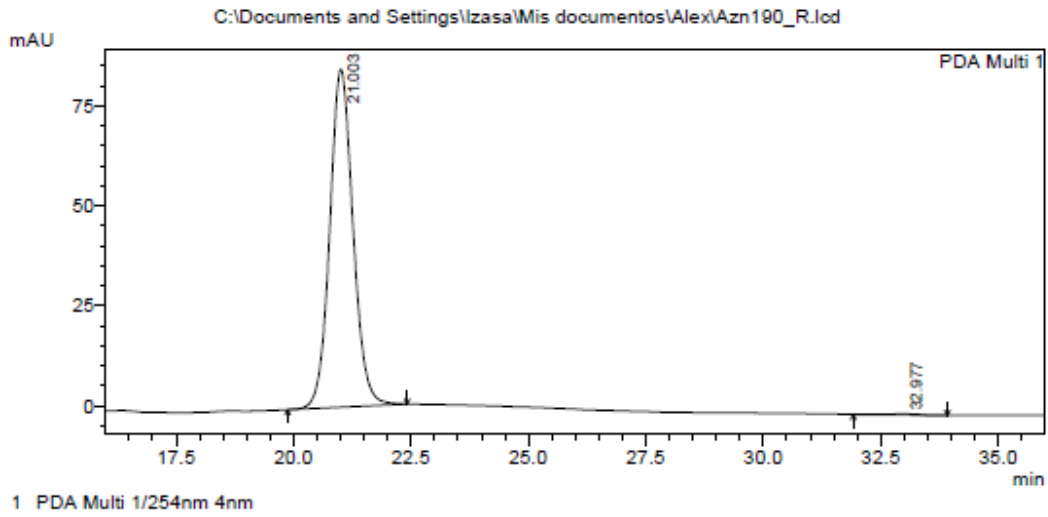

PDA Ch1 254nm 4nm

PeakTable

| Peak# | Ret. Time | Area    | Height | Area %  | Height % |
|-------|-----------|---------|--------|---------|----------|
| 1     | 21.003    | 2910351 | 84445  | 99.663  | 99.708   |
| 2     | 32.977    | 9848    | 247    | 0.337   | 0.292    |
| Total |           | 2920199 | 84692  | 100.000 | 100.000  |

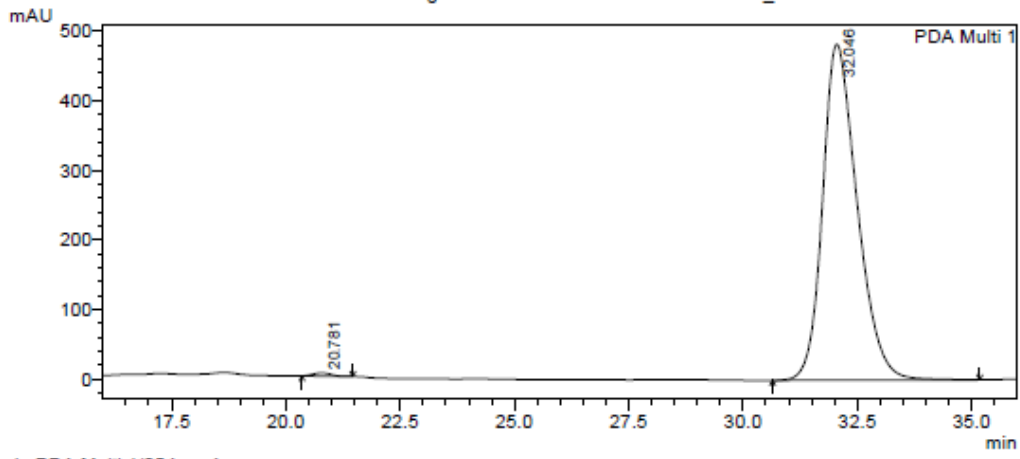

1 PDA Multi 1/254nm 4nm

PeakTable

| Peak# | Ret. Time | Area     | Height | Area %  | Height % |
|-------|-----------|----------|--------|---------|----------|
| 1     | 20.781    | 121086   | 4544   | 0.473   | 0.932    |
| 2     | 32.046    | 25485544 | 482960 | 99.527  | 99.068   |
| Total |           | 25606630 | 487504 | 100.000 | 100.000  |

7c

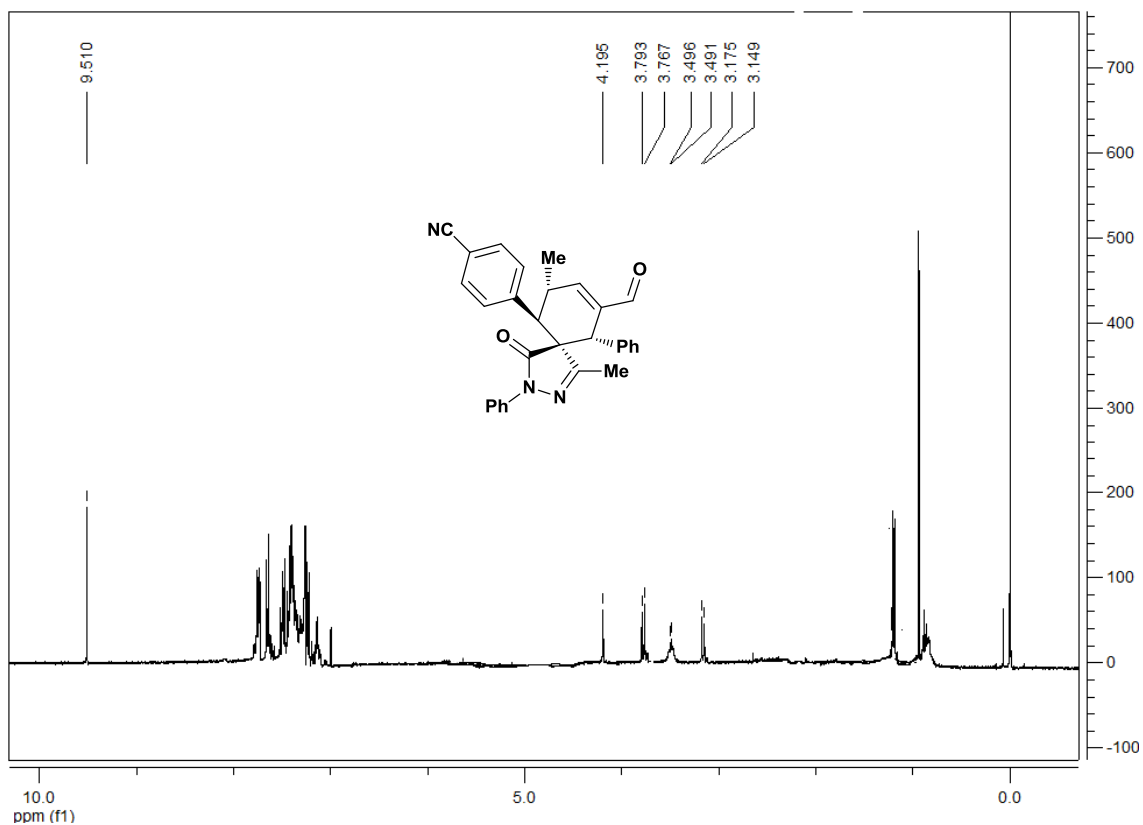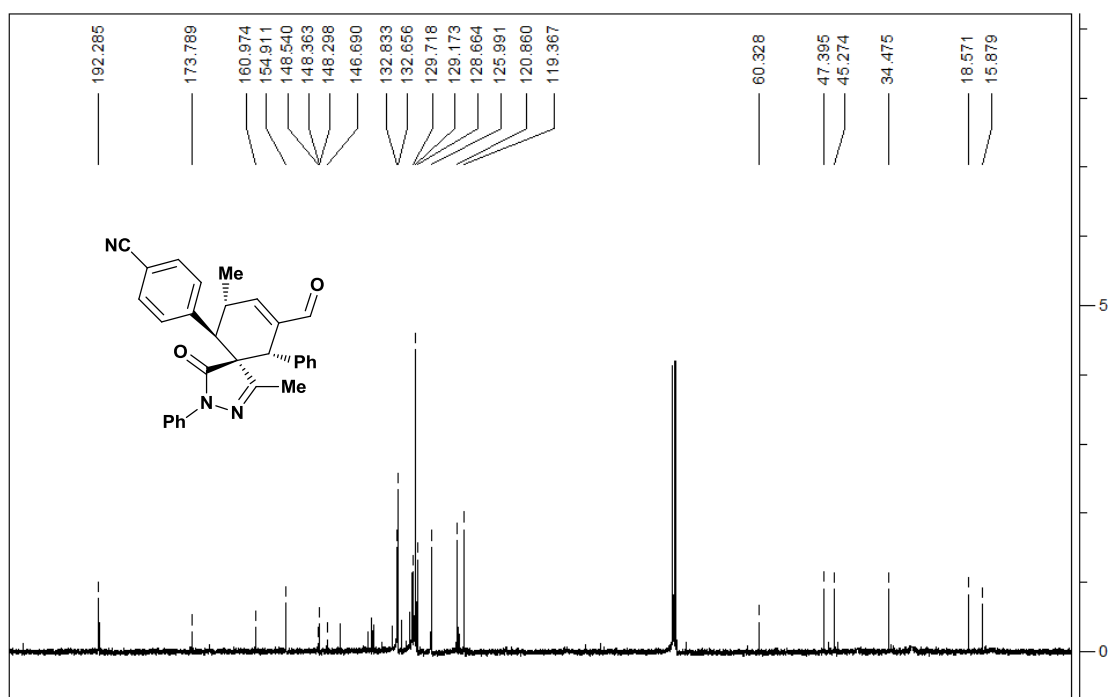

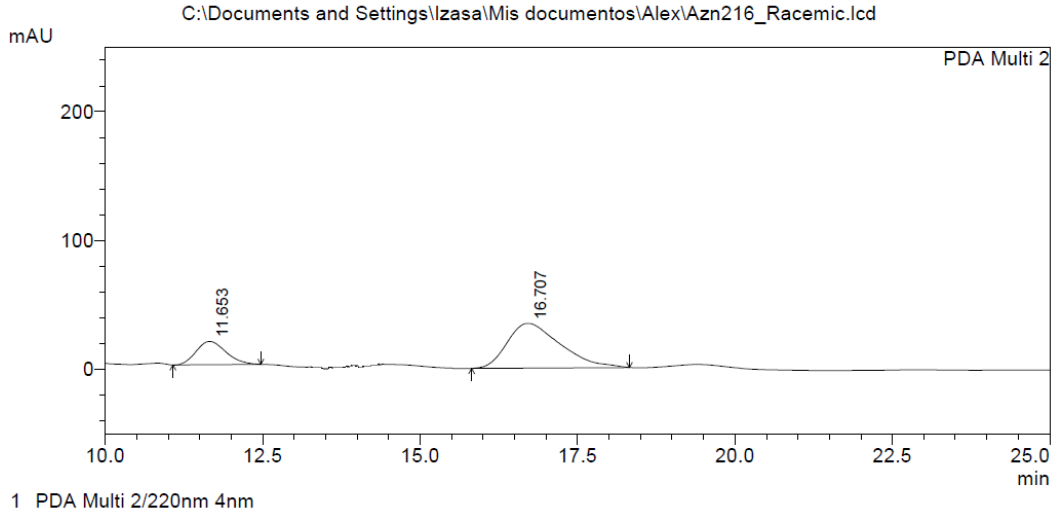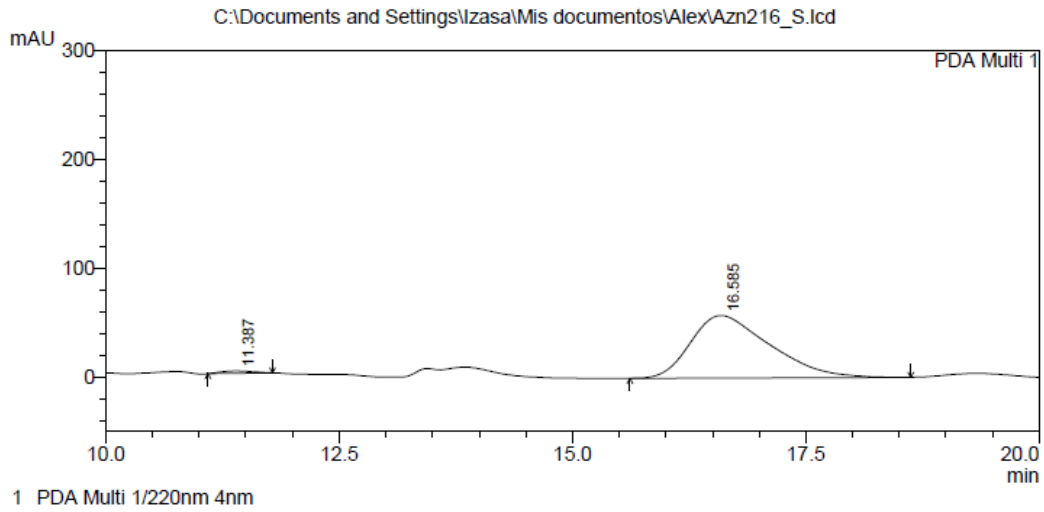

PeakTable

| Peak# | Ret. Time | Area    | Height | Area %  | Height % |
|-------|-----------|---------|--------|---------|----------|
| 1     | 11.387    | 48436   | 2027   | 1.417   | 3.416    |
| 2     | 16.585    | 3368736 | 57313  | 98.583  | 96.584   |
| Total |           | 3417172 | 59340  | 100.000 | 100.000  |

7q

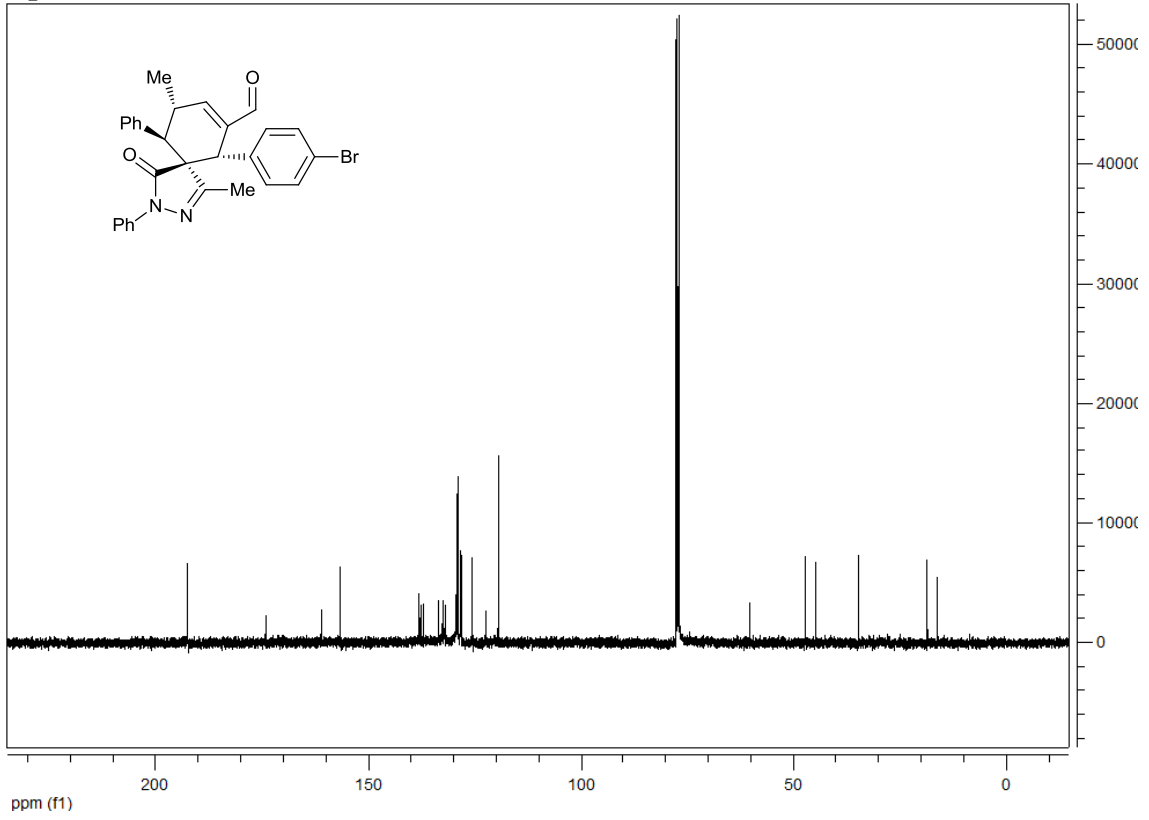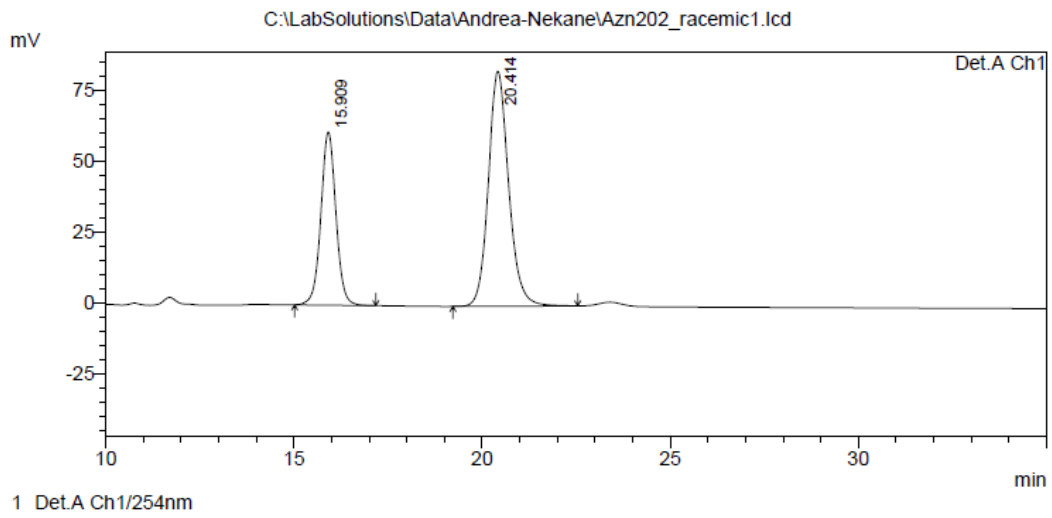



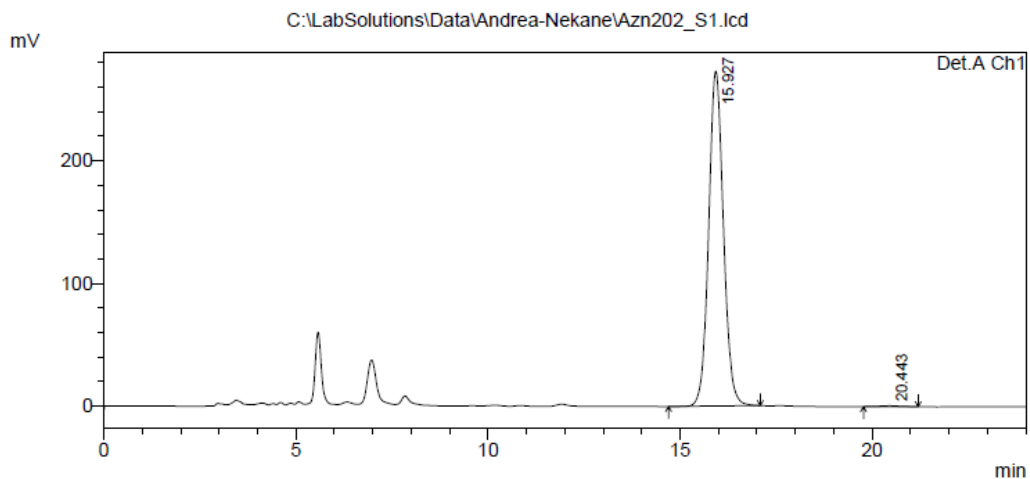

PeakTable

| Peak# | Ret. Time | Area    | Height | Area %  | Height % |
|-------|-----------|---------|--------|---------|----------|
| 1     | 15.927    | 7312212 | 273272 | 99.648  | 99.729   |
| 2     | 20.443    | 25866   | 741    | 0.352   | 0.271    |
| Total |           | 7338078 | 274014 | 100.000 | 100.000  |

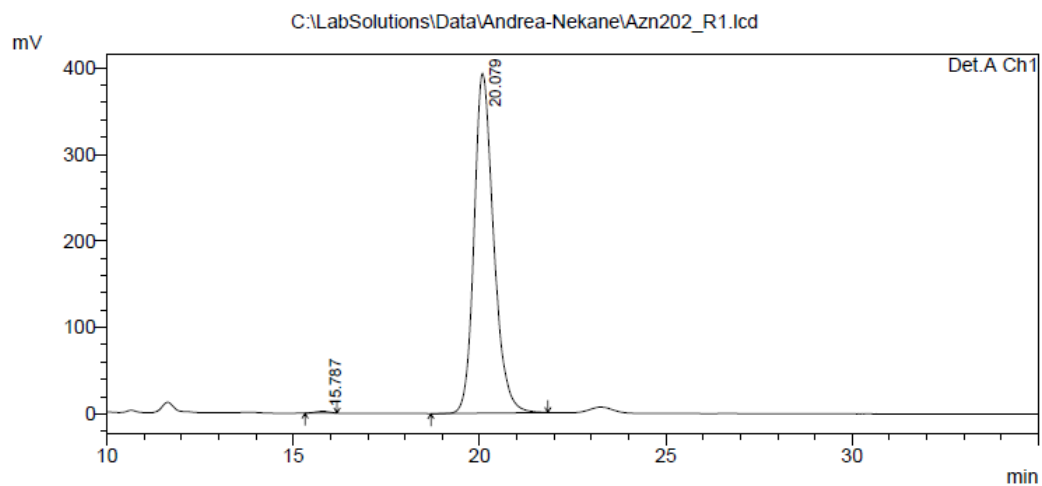

PeakTable

| Peak# | Ret. Time | Area     | Height | Area %  | Height % |
|-------|-----------|----------|--------|---------|----------|
| 1     | 15.787    | 52614    | 2124   | 0.366   | 0.537    |
| 2     | 20.079    | 14339397 | 393122 | 99.634  | 99.463   |
| Total |           | 14392011 | 395246 | 100.000 | 100.000  |

7p

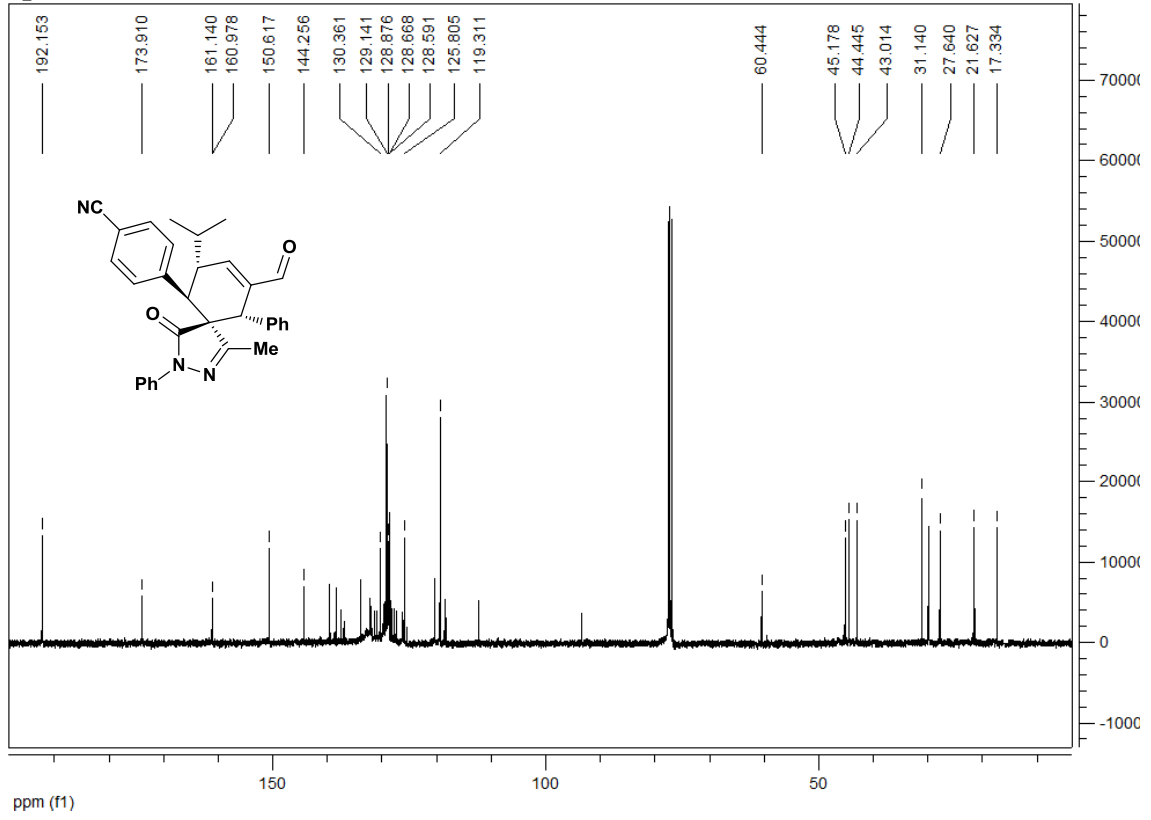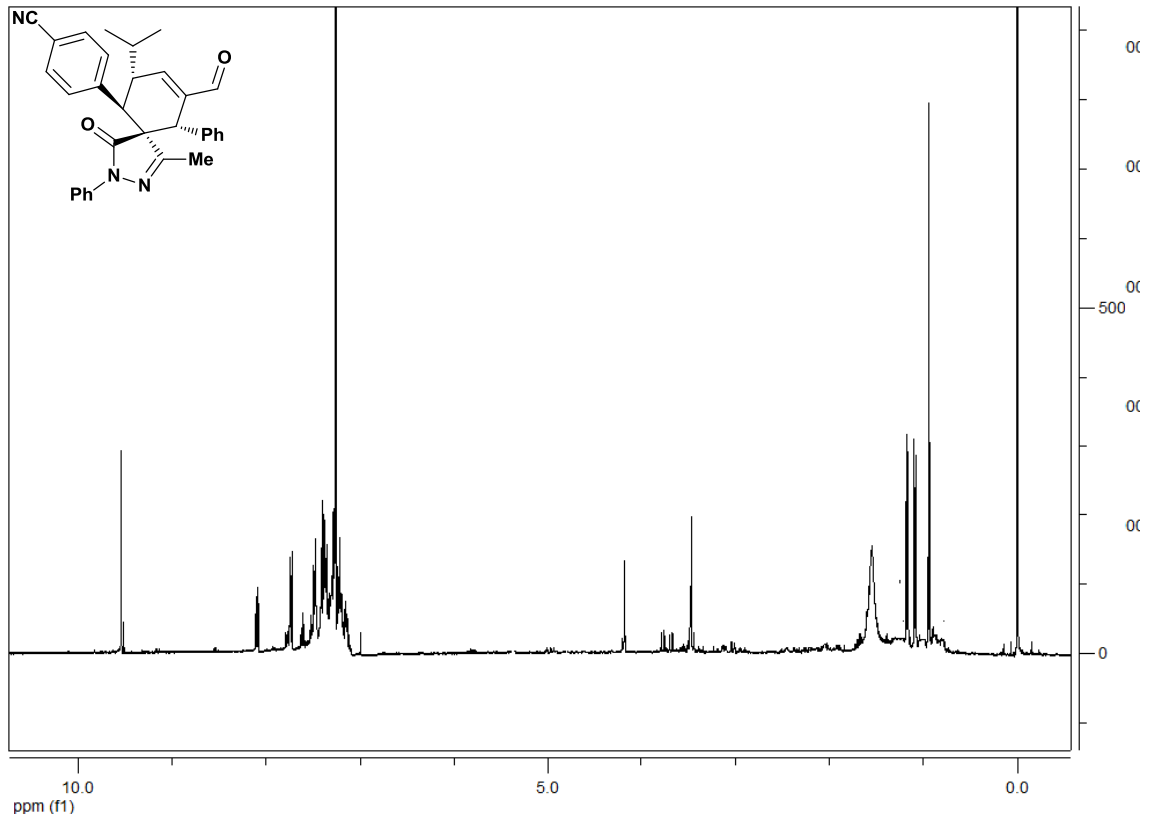

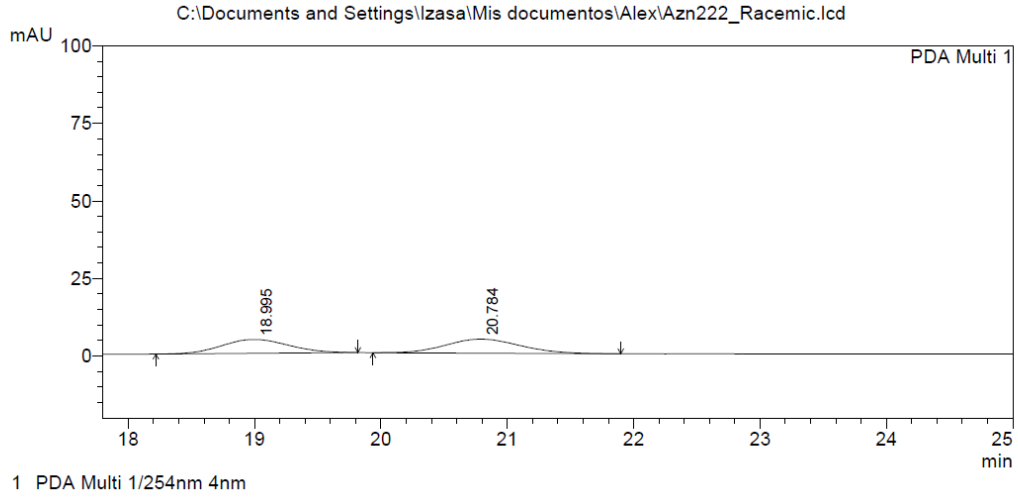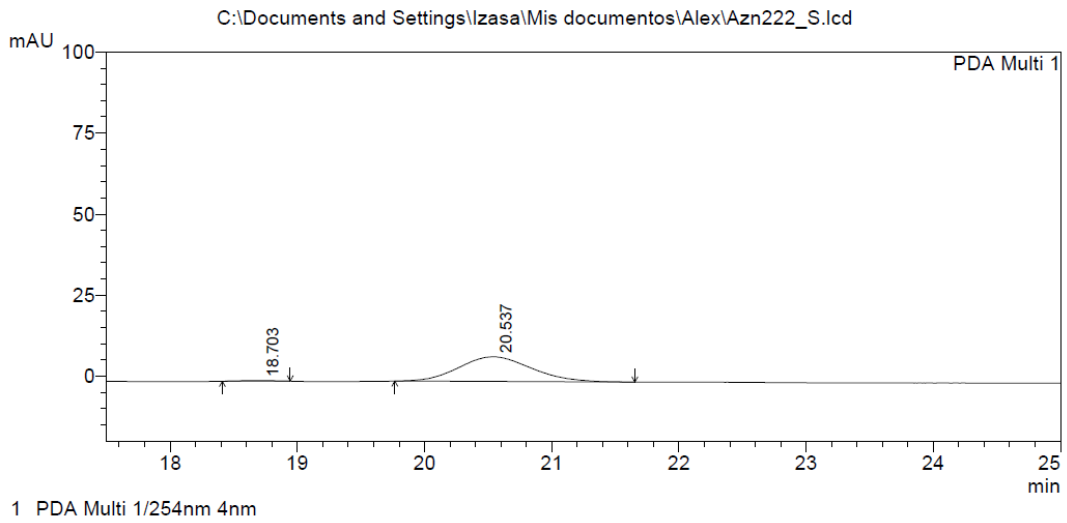

PeakTable

PDA Ch1 254nm 4nm

| Peak# | Ret. Time | Area   | Height | Area %  | Height % |
|-------|-----------|--------|--------|---------|----------|
| 1     | 18.703    | 2894   | 146    | 0.951   | 1.883    |
| 2     | 20.537    | 301375 | 7595   | 99.049  | 98.117   |
| Total |           | 304268 | 7741   | 100.000 | 100.000  |

7r

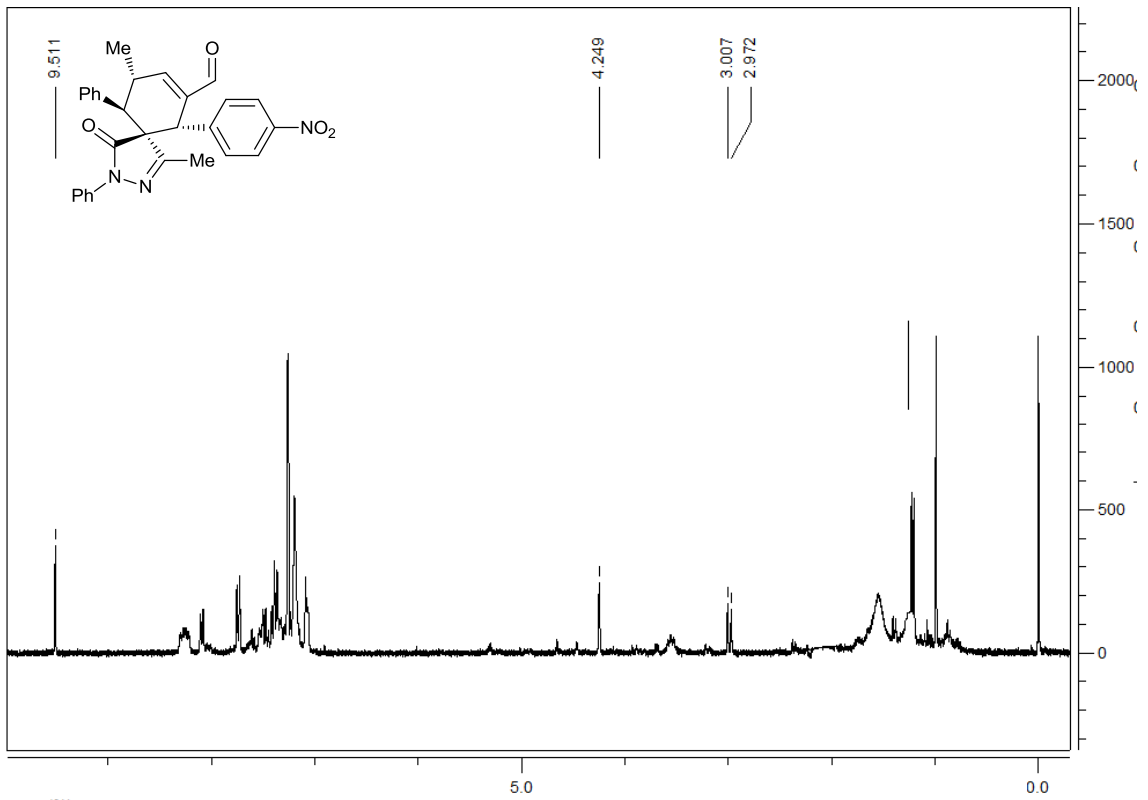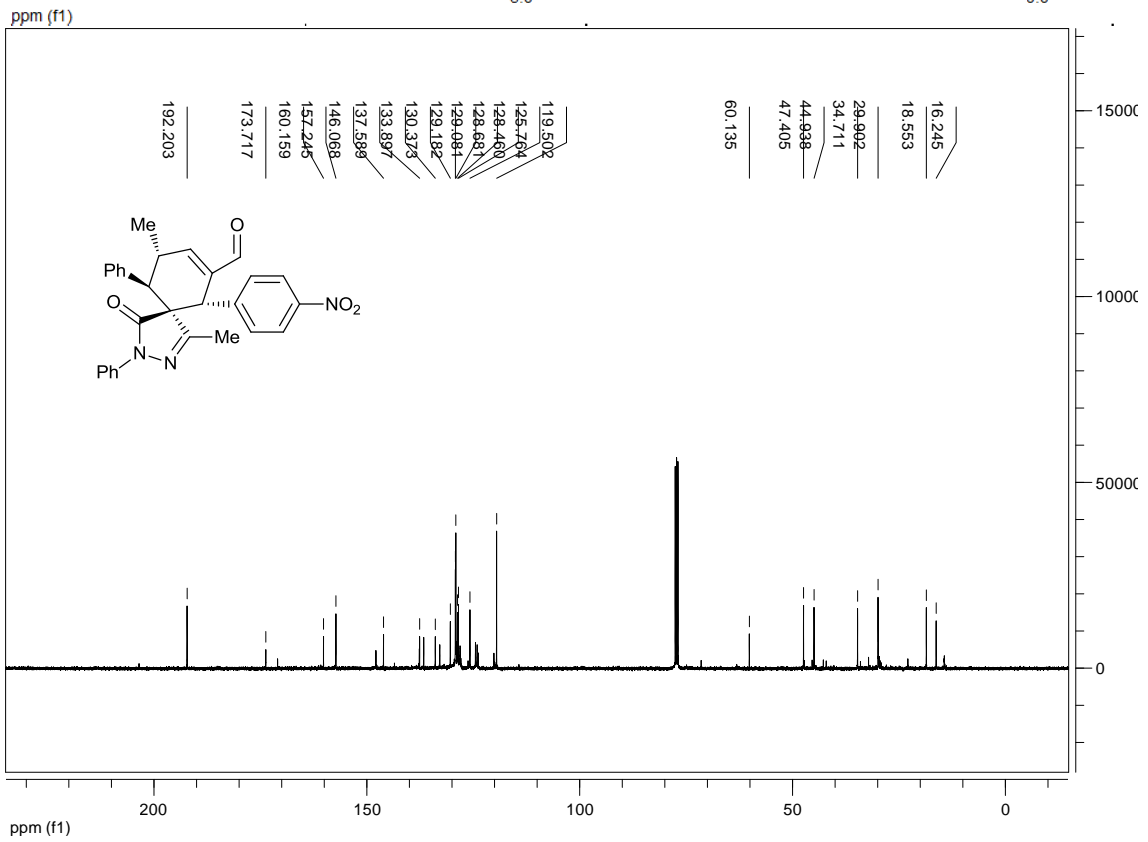

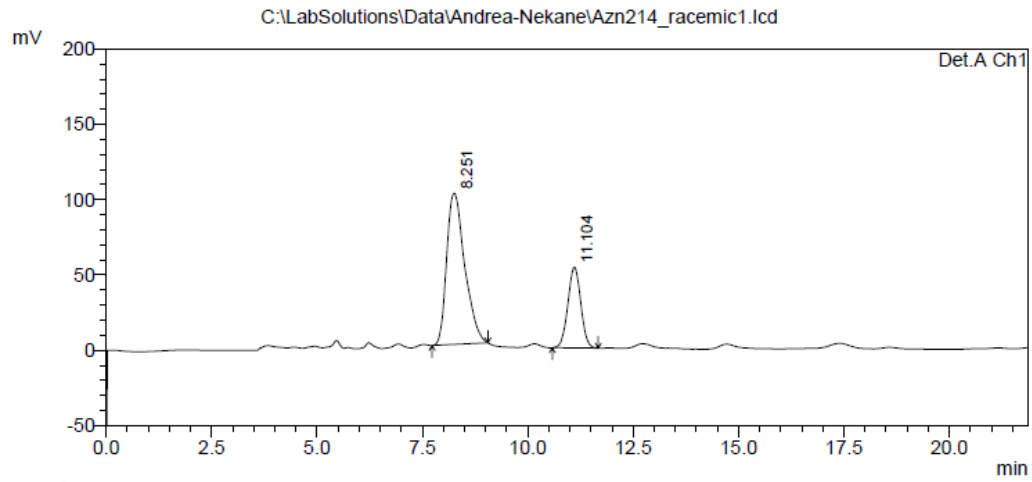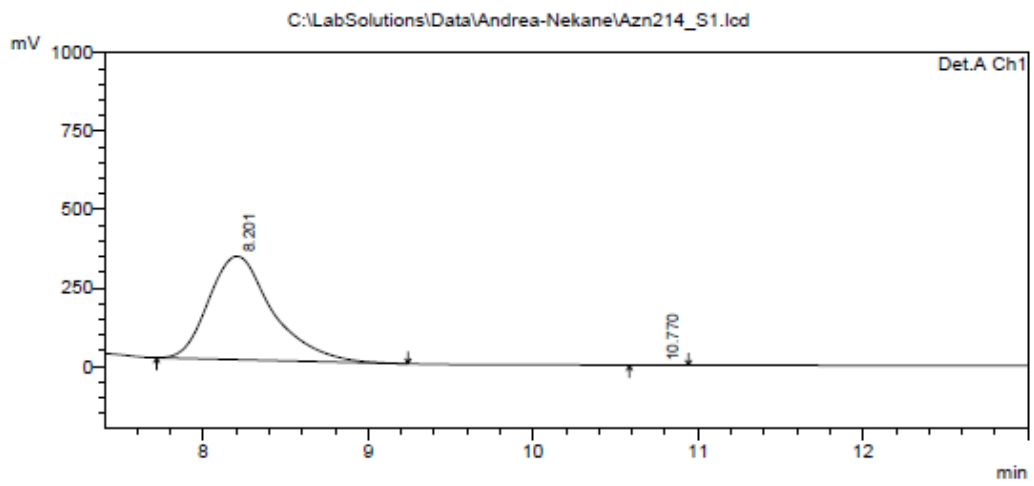

PeakTable

| Peak# | Ret. Time | Area    | Height | Area %  | Height % |
|-------|-----------|---------|--------|---------|----------|
| 1     | 8.201     | 8866080 | 330203 | 99.937  | 99.858   |
| 2     | 10.770    | 5600    | 471    | 0.063   | 0.142    |
| Total |           | 8871681 | 330674 | 100.000 | 100.000  |

7o

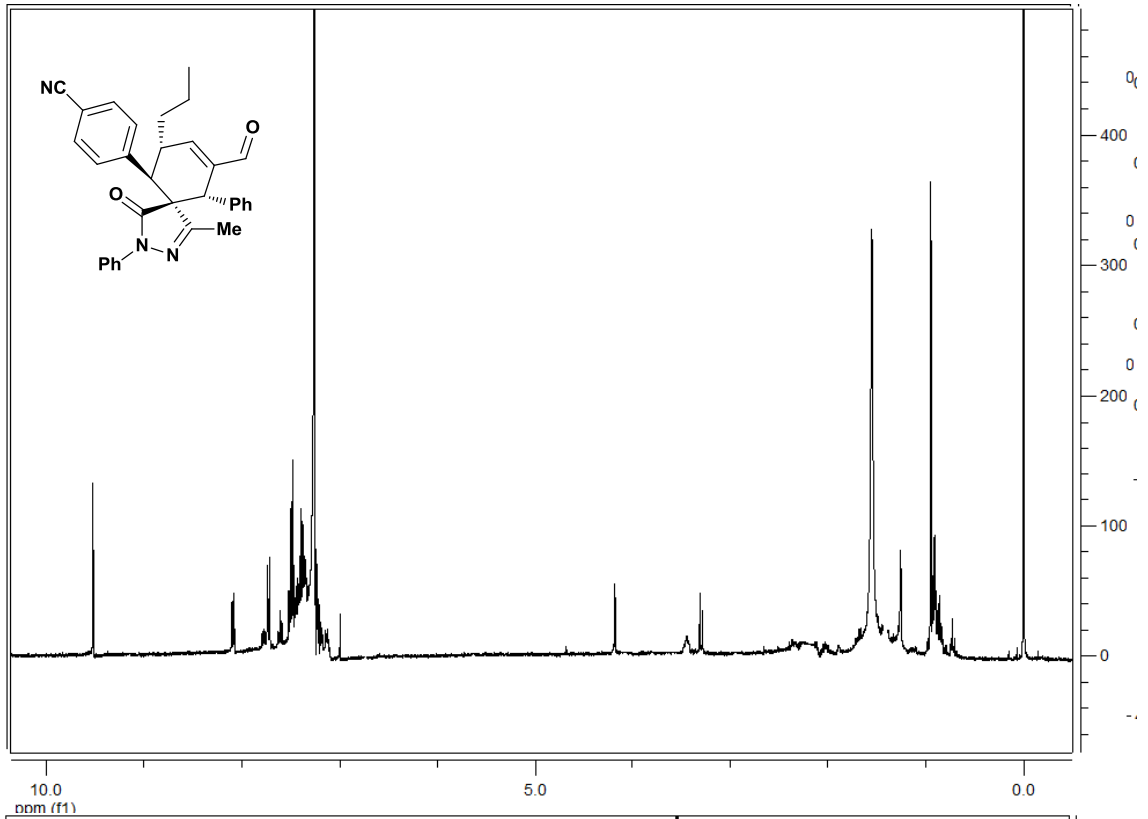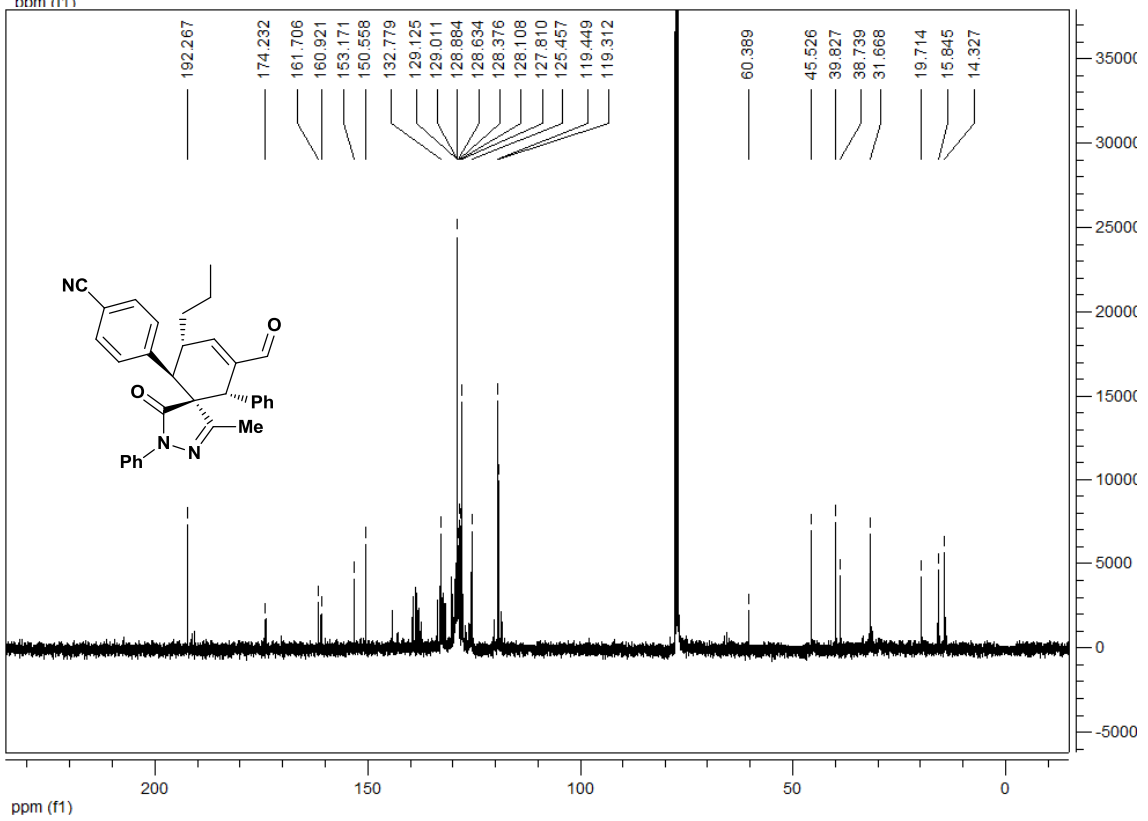

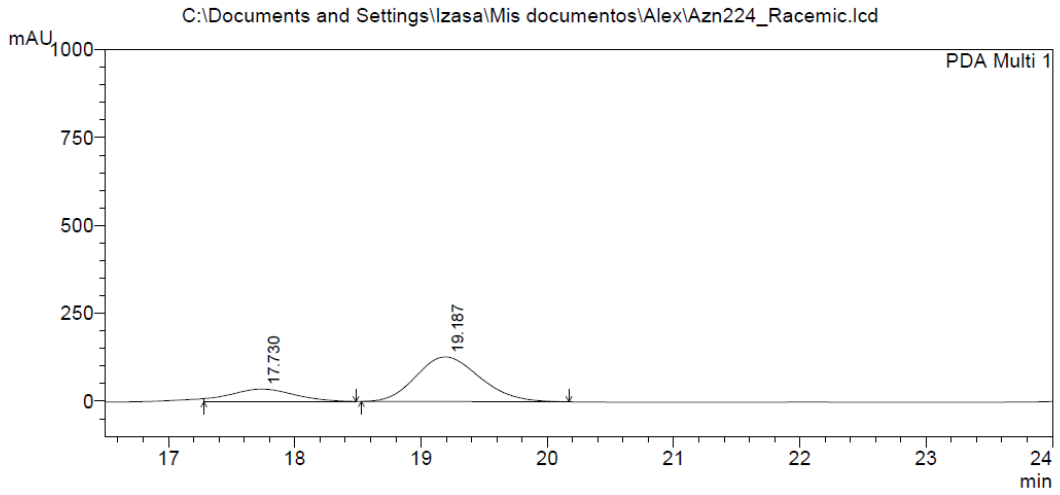

1 PDA Multi 1/254nm 4nm

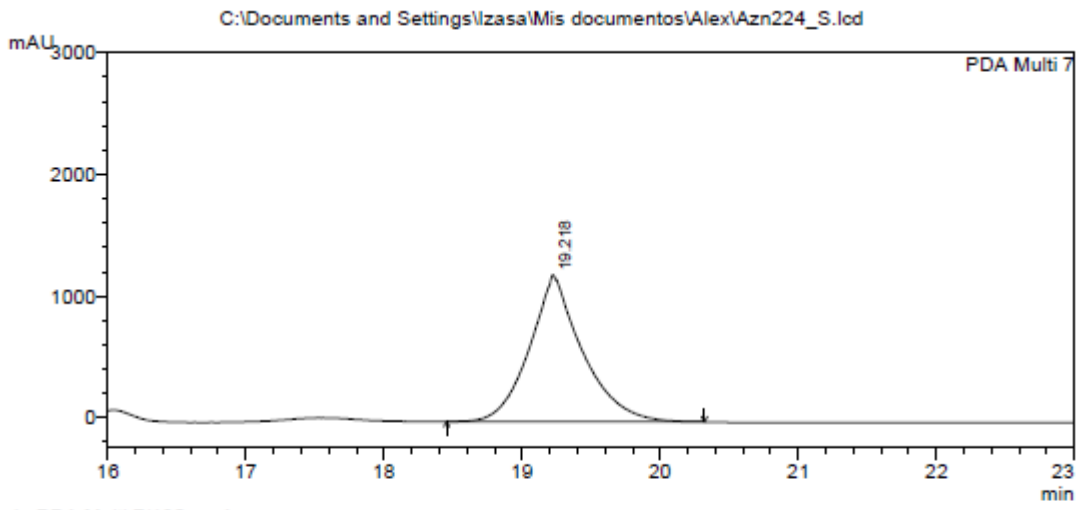

1 PDA Multi 7/190nm 4nm

PeakTable

| Peak# | Ret. Time | Area     | Height  | Area %  | Height % |
|-------|-----------|----------|---------|---------|----------|
| 1     | 19.218    | 31991587 | 1210050 | 100.000 | 100.000  |
| Total |           | 31991587 | 1210050 | 100.000 | 100.000  |

7i

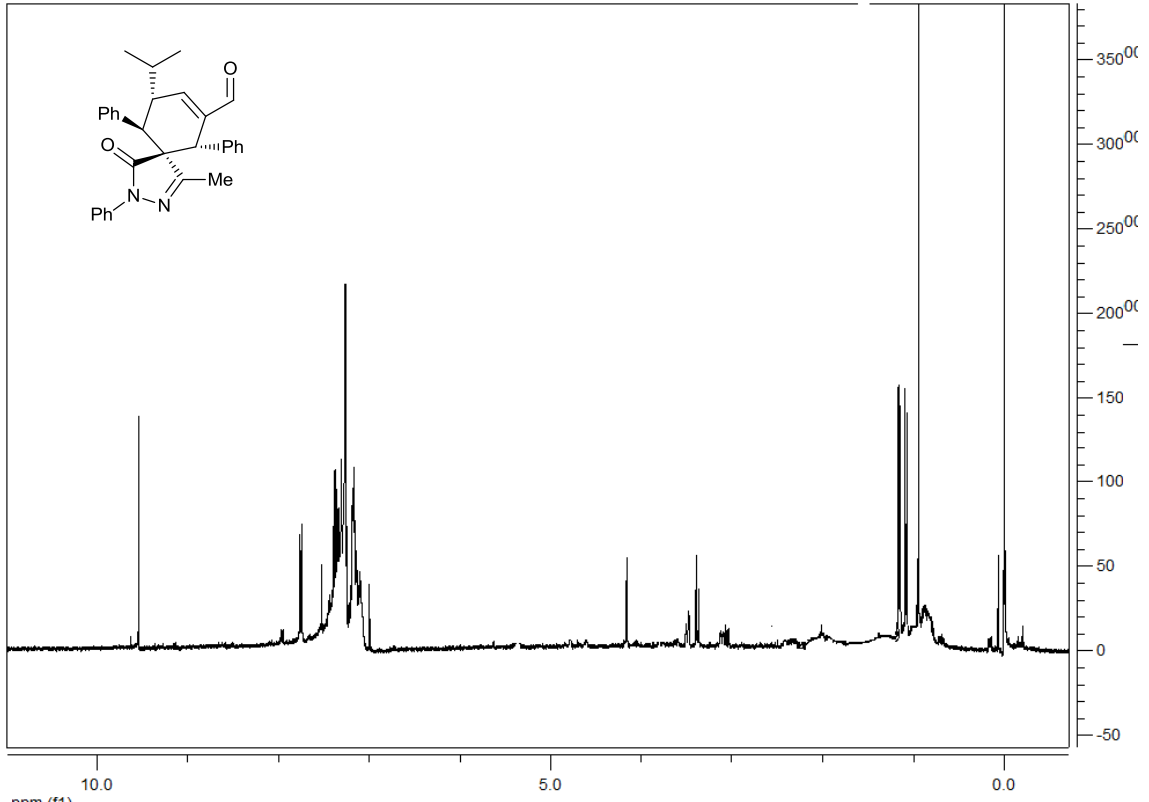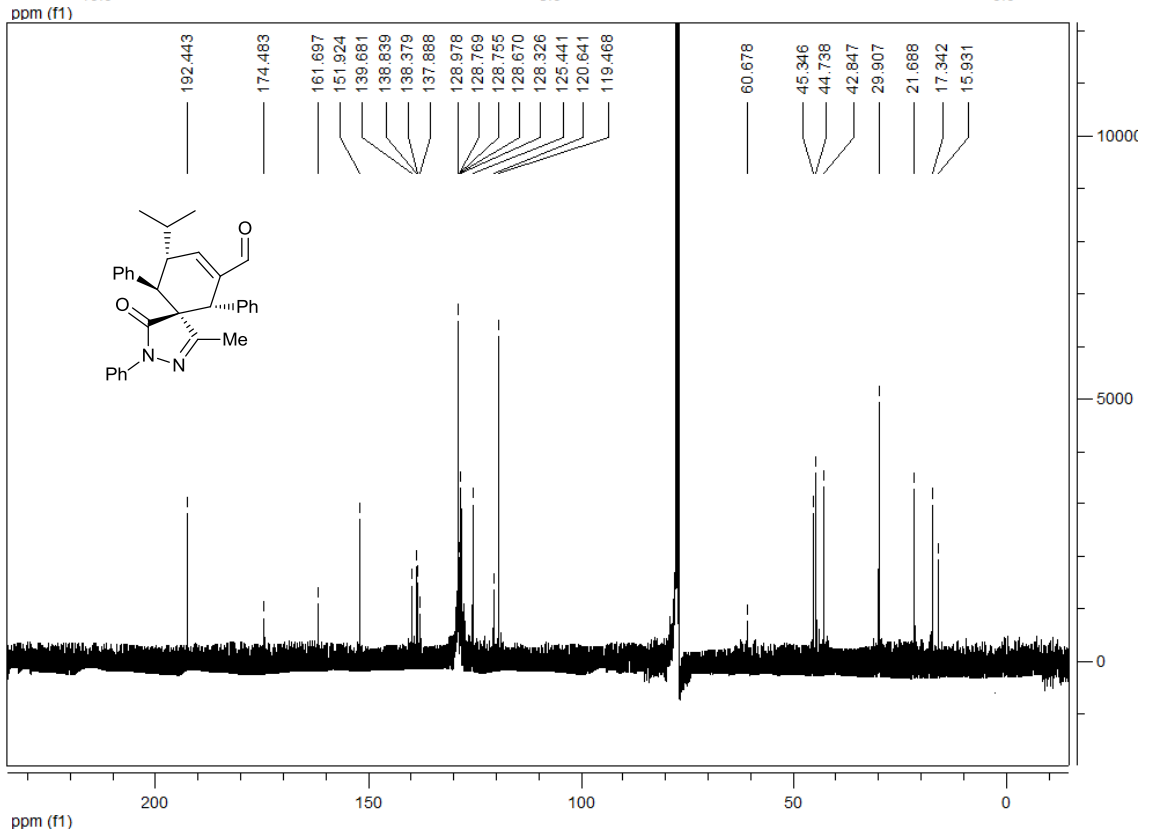



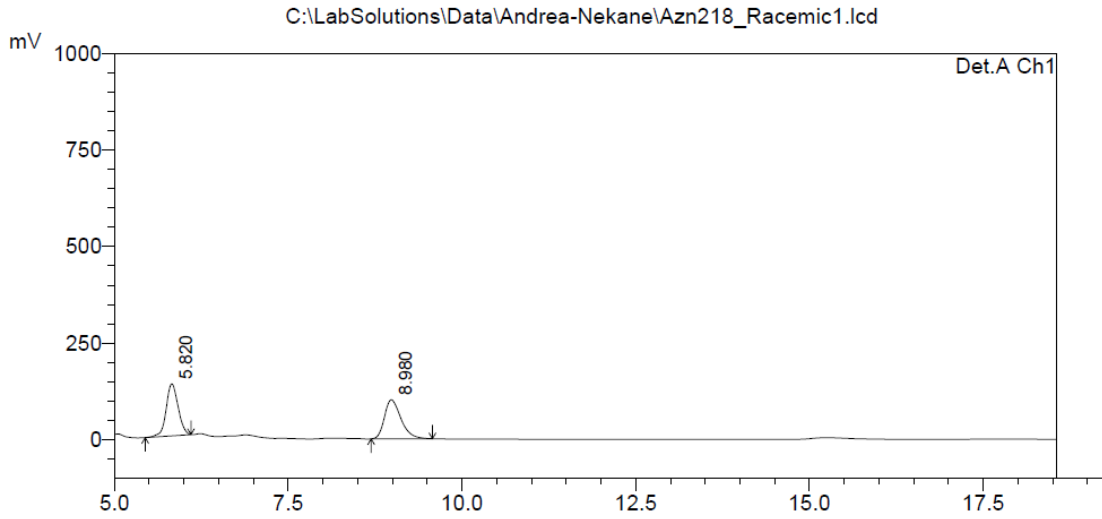

1 Det.A Ch1/254nm

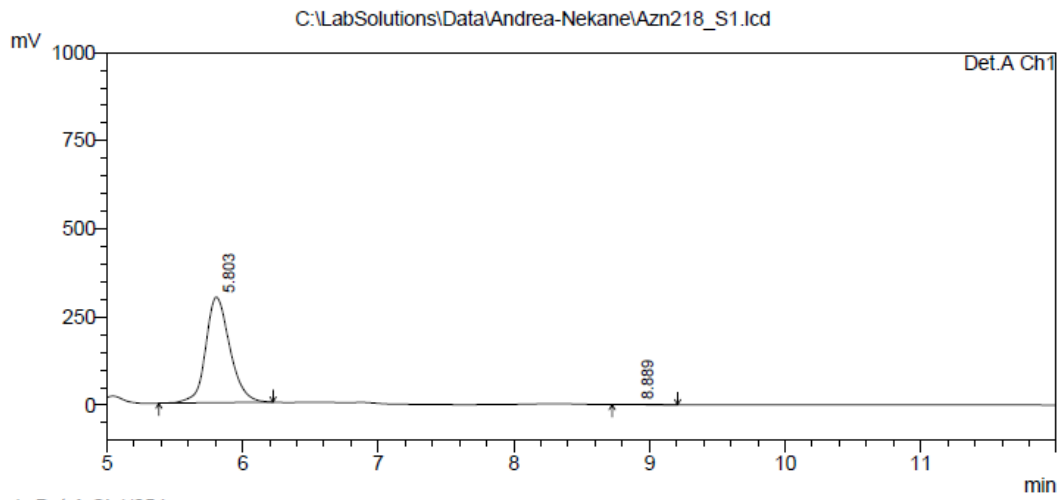

1 Det.A Ch1/254nm

PeakTable

Detector A Ch1 254nm

| Peak# | Ret. Time | Area    | Height | Area %  | Height % |
|-------|-----------|---------|--------|---------|----------|
| 1     | 5.803     | 3715192 | 299658 | 99.668  | 99.703   |
| 2     | 8.889     | 12373   | 891    | 0.332   | 0.297    |
| Total |           | 3727565 | 300549 | 100.000 | 100.000  |

7k

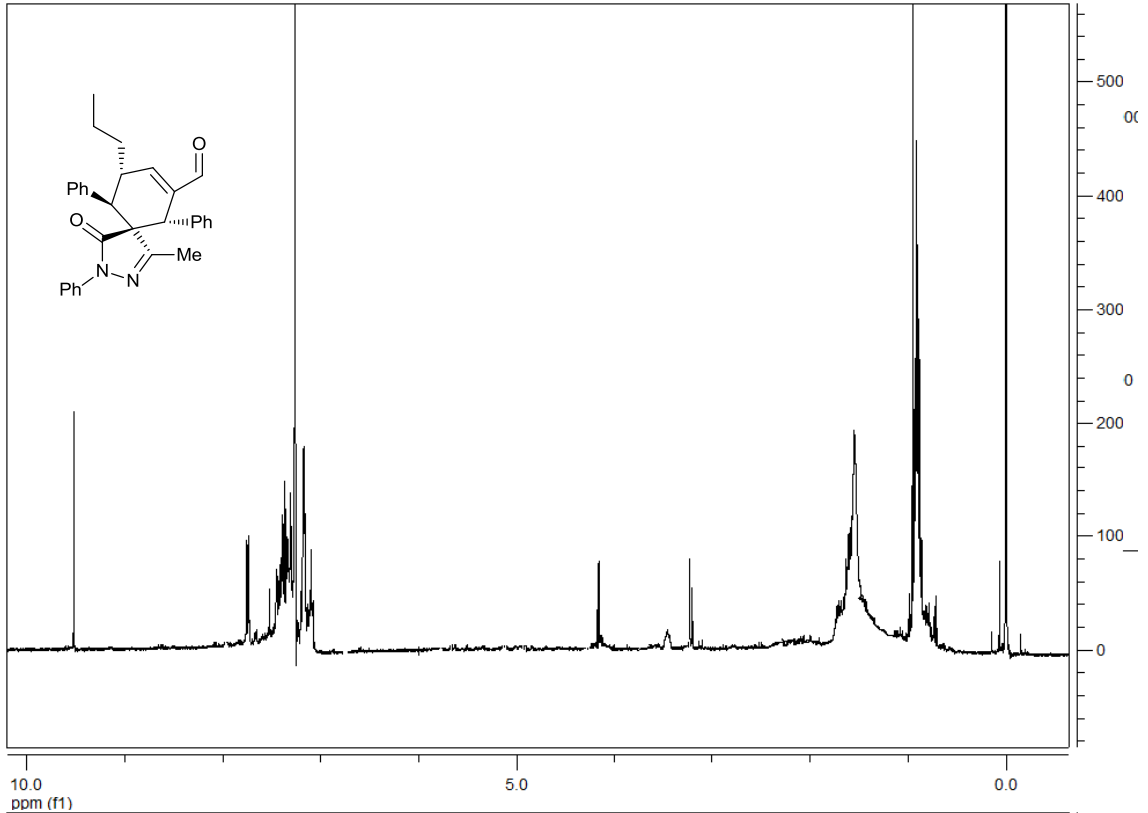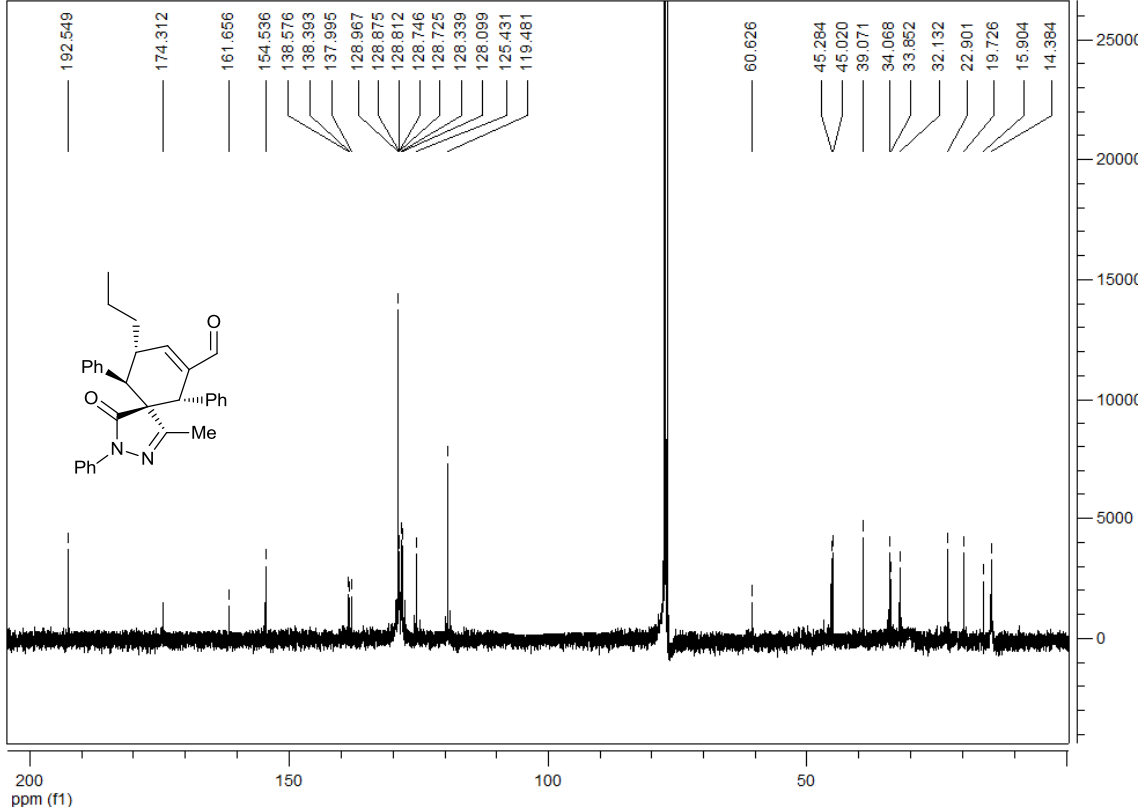

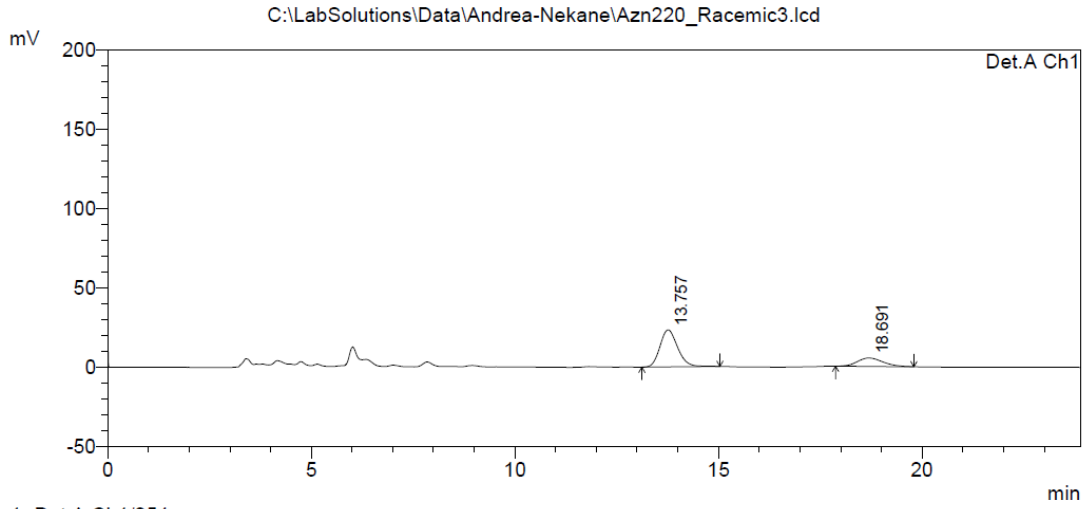

1 Det.A Ch1/254nm

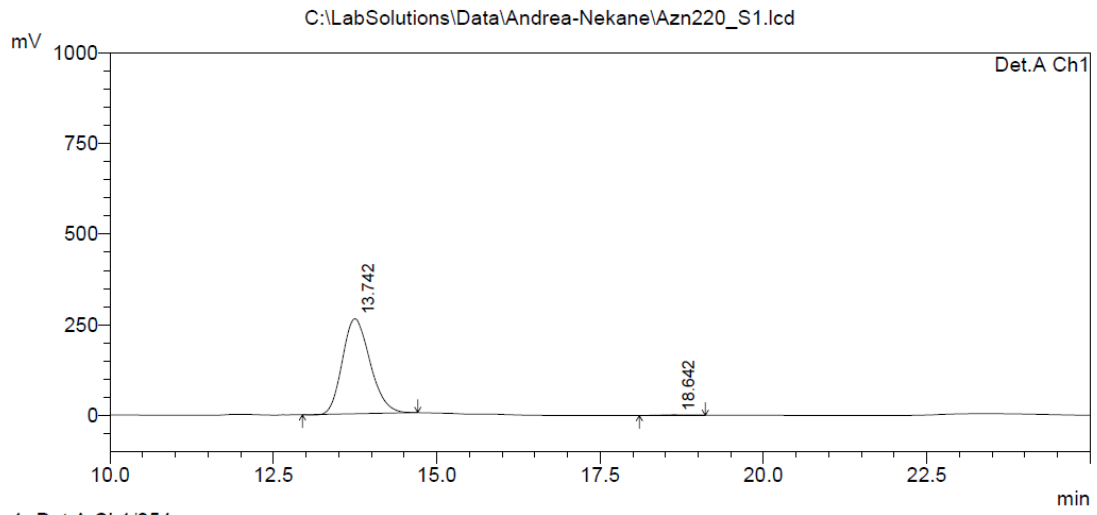

1 Det.A Ch1/254nm

PeakTable

Detector A Ch1 254nm

| Peak# | Ret. Time | Area    | Height | Area %  | Height % |
|-------|-----------|---------|--------|---------|----------|
| 1     | 13.742    | 7724380 | 261717 | 99.198  | 99.333   |
| 2     | 18.642    | 62480   | 1758   | 0.802   | 0.667    |
| Total |           | 7786859 | 263475 | 100.000 | 100.000  |

7b

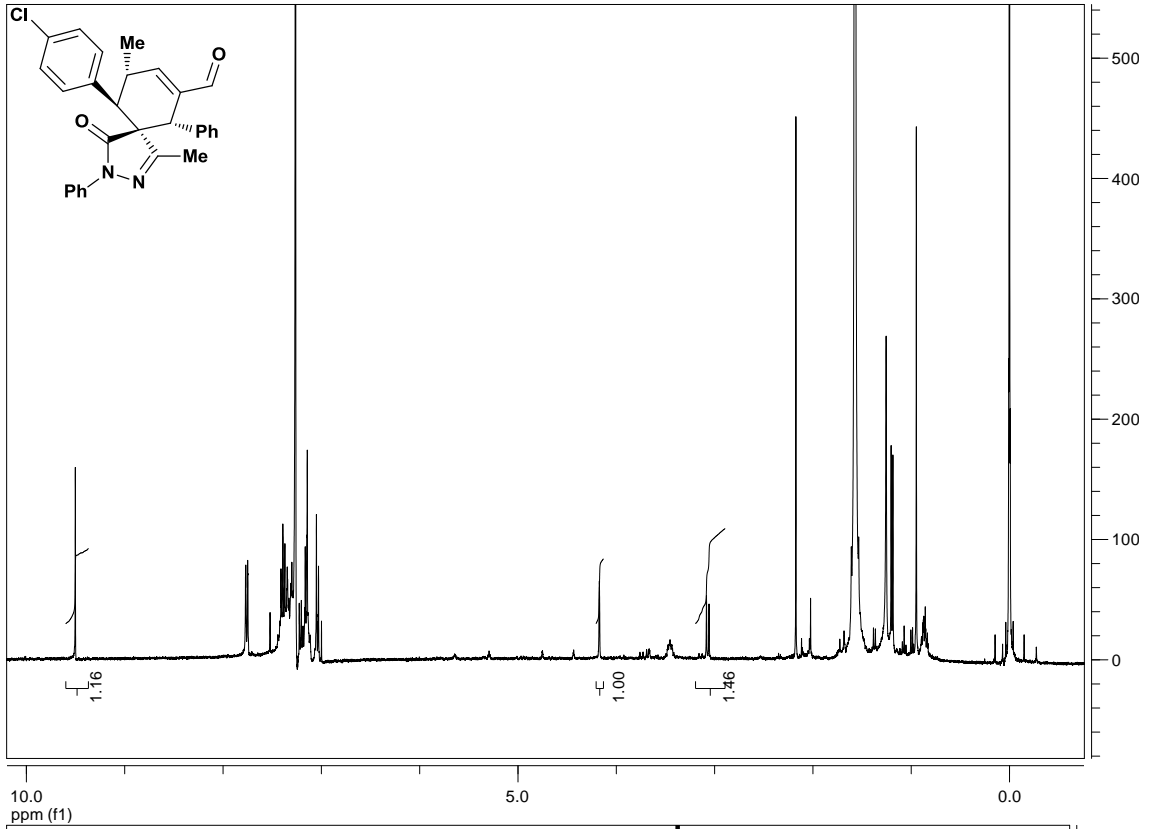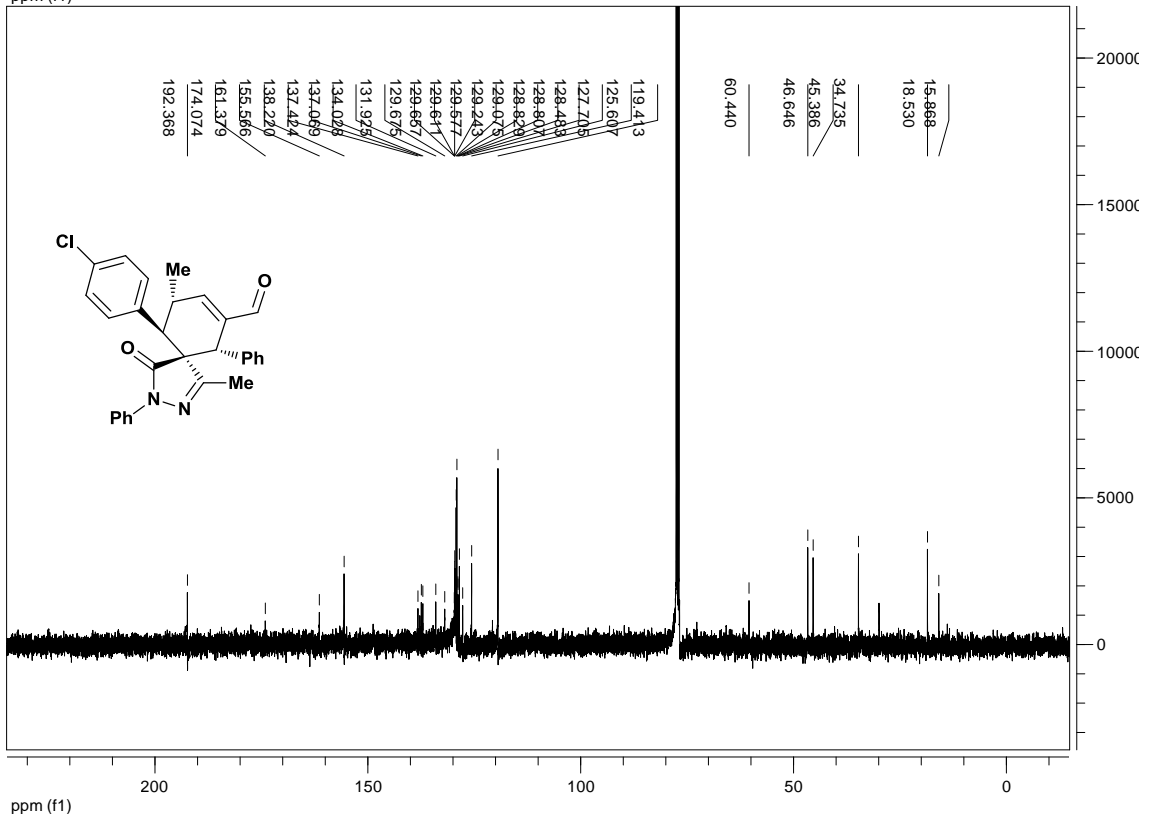

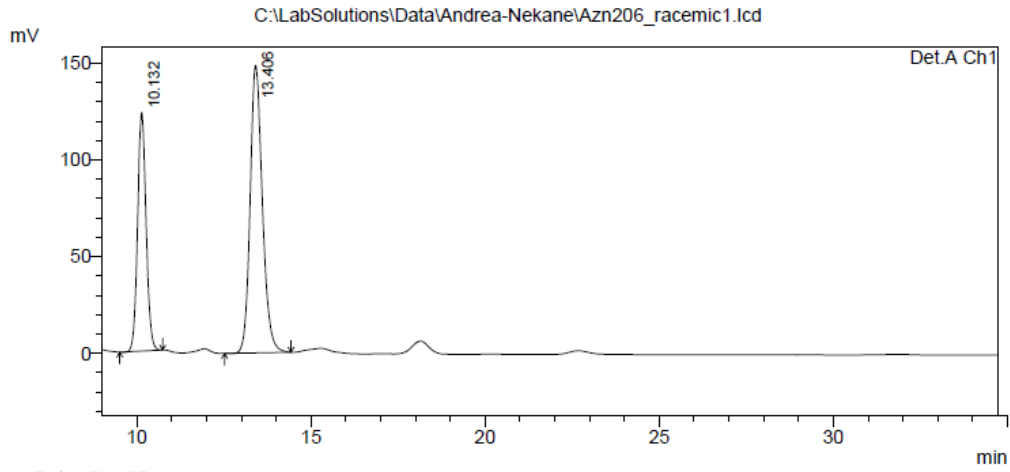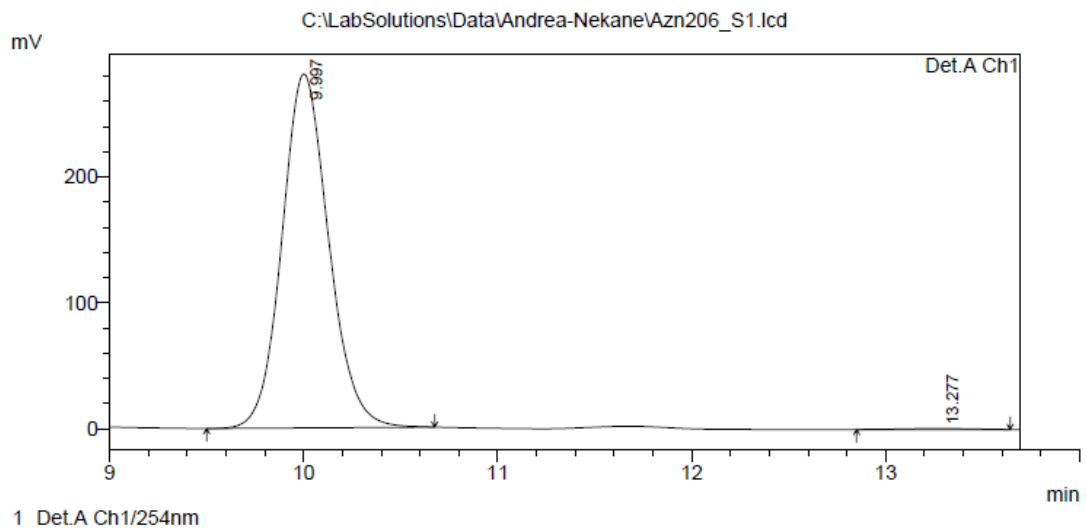

Detector A Ch1 254nm

PeakTable

| Peak# | Ret. Time | Area    | Height | Area %  | Height % |
|-------|-----------|---------|--------|---------|----------|
| 1     | 9.997     | 4709726 | 281217 | 99.622  | 99.729   |
| 2     | 13.277    | 17849   | 765    | 0.378   | 0.271    |
| Total |           | 4727575 | 281982 | 100.000 | 100.000  |

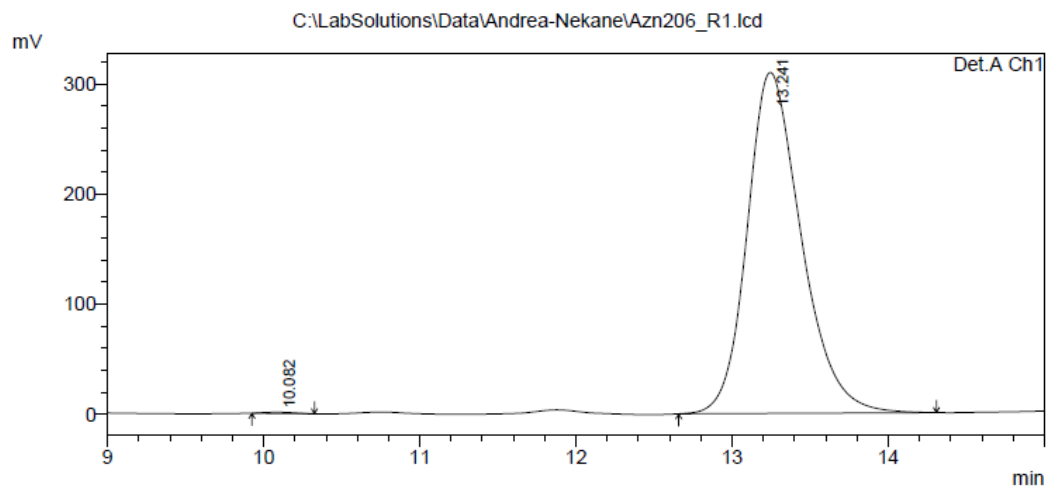

PeakTable

Detector A Ch1 254nm

| Peak# | Ret. Time | Area    | Height | Area %  | Height % |
|-------|-----------|---------|--------|---------|----------|
| 1     | 10.082    | 14680   | 1152   | 0.196   | 0.371    |
| 2     | 13.241    | 7462295 | 309140 | 99.804  | 99.629   |
| Total |           | 7476975 | 310291 | 100.000 | 100.000  |

7n

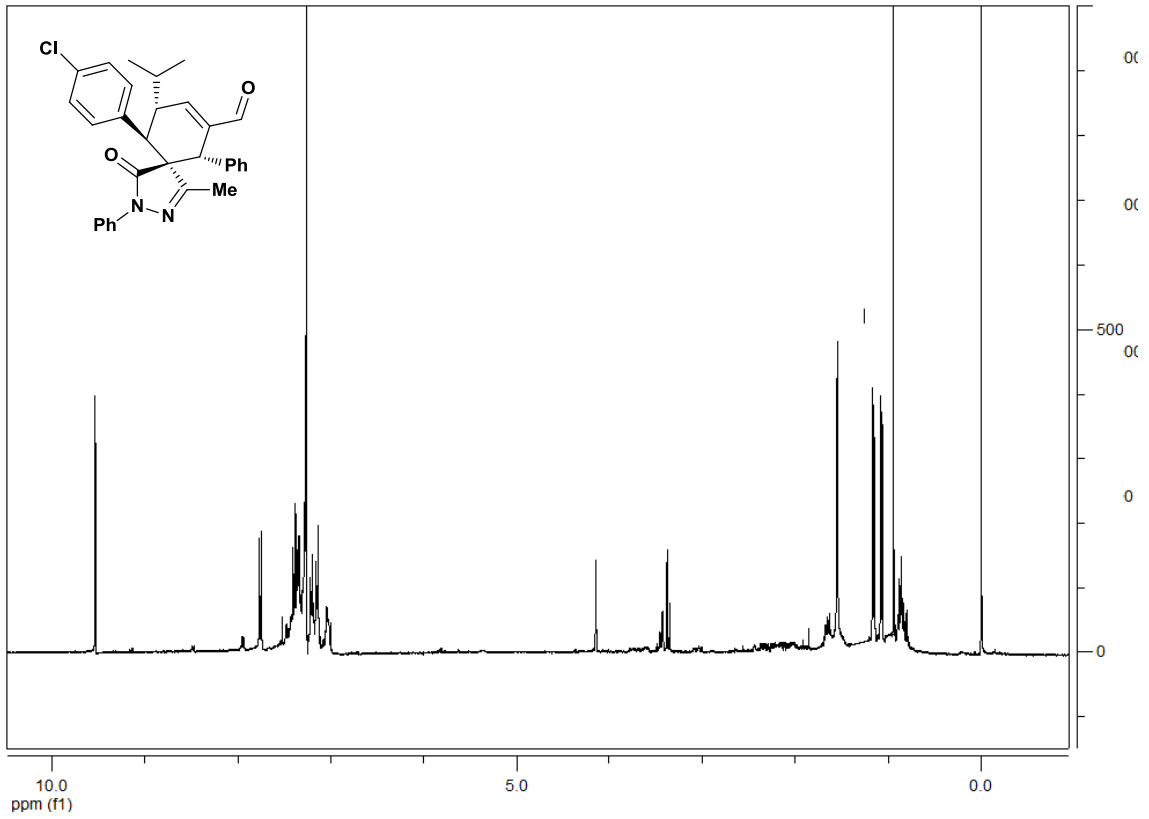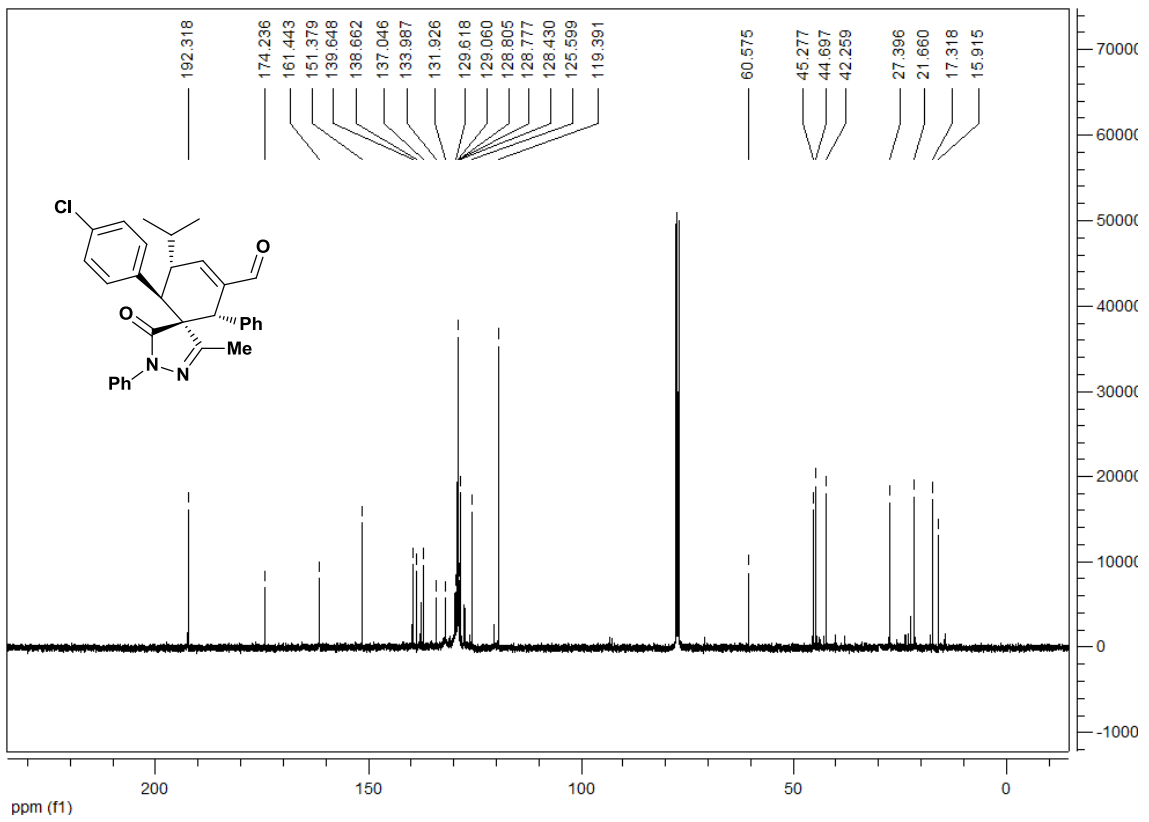

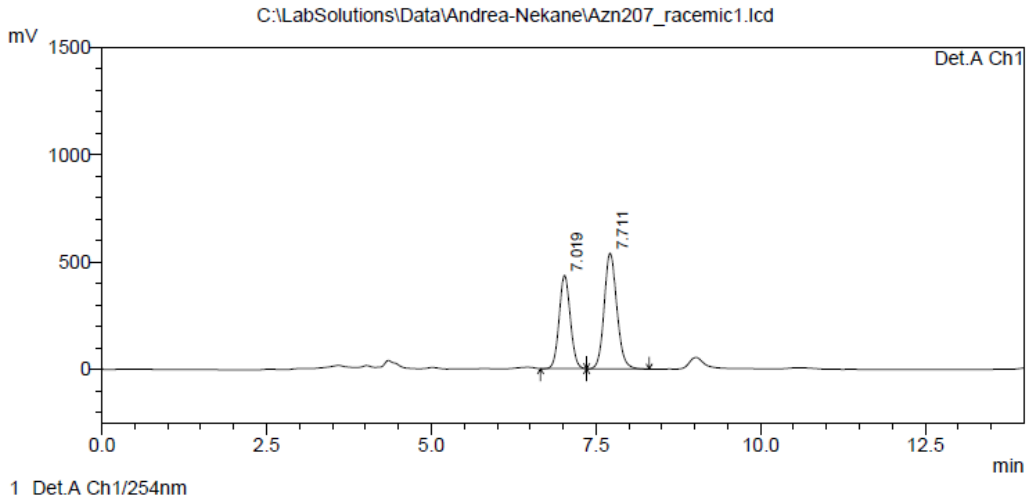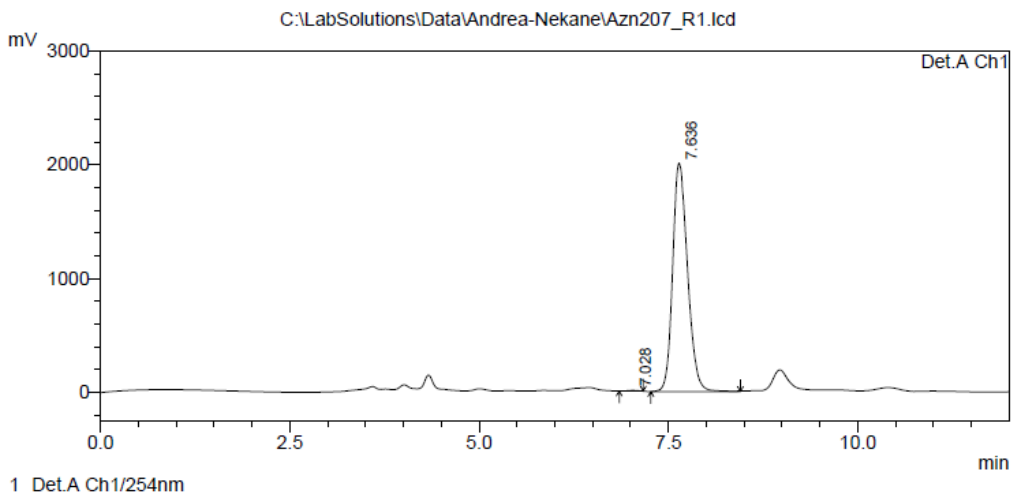

PeakTable

| Detector A Ch1 254nm |           |          |         |         |          |  |
|----------------------|-----------|----------|---------|---------|----------|--|
| Peak#                | Ret. Time | Area     | Height  | Area %  | Height % |  |
| 1                    | 7.028     | 51087    | 5175    | 0.186   | 0.257    |  |
| 2                    | 7.636     | 27414170 | 2008261 | 99.814  | 99.743   |  |
| Total                |           | 27465257 | 2013436 | 100.000 | 100.000  |  |



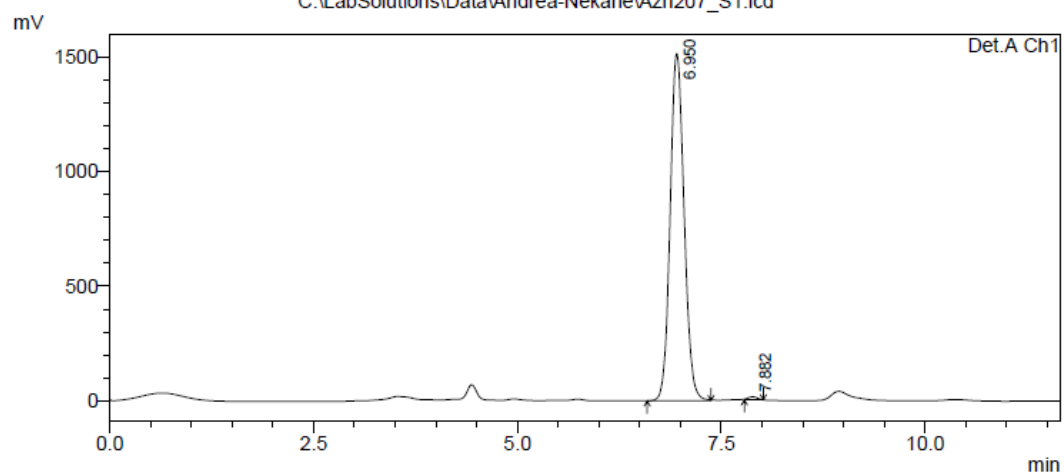

1 Det.A Ch1/254nm

PeakTable

Detector A Ch1 254nm

| Peak# | Ret. Time | Area     | Height  | Area %  | Height % |
|-------|-----------|----------|---------|---------|----------|
| 1     | 6.950     | 18017985 | 1513427 | 99.404  | 99.125   |
| 2     | 7.882     | 107946   | 13354   | 0.596   | 0.875    |
| Total |           | 18125931 | 1526781 | 100.000 | 100.000  |

7m

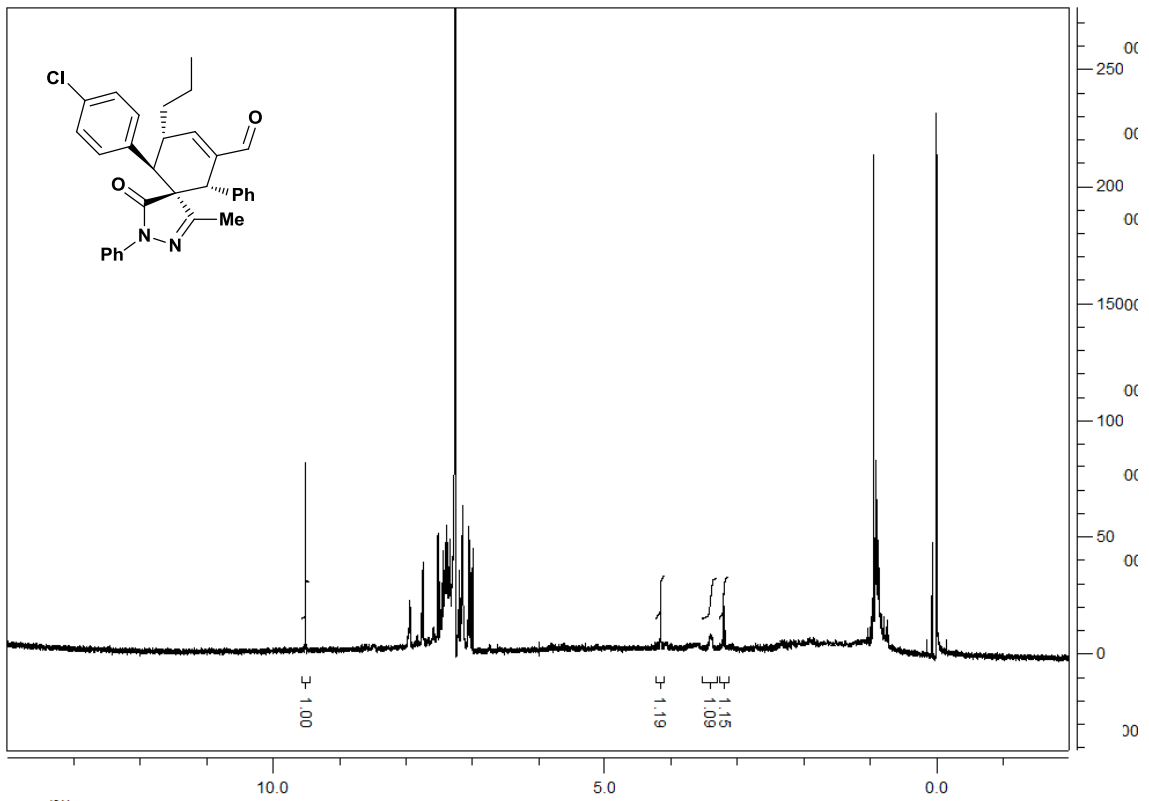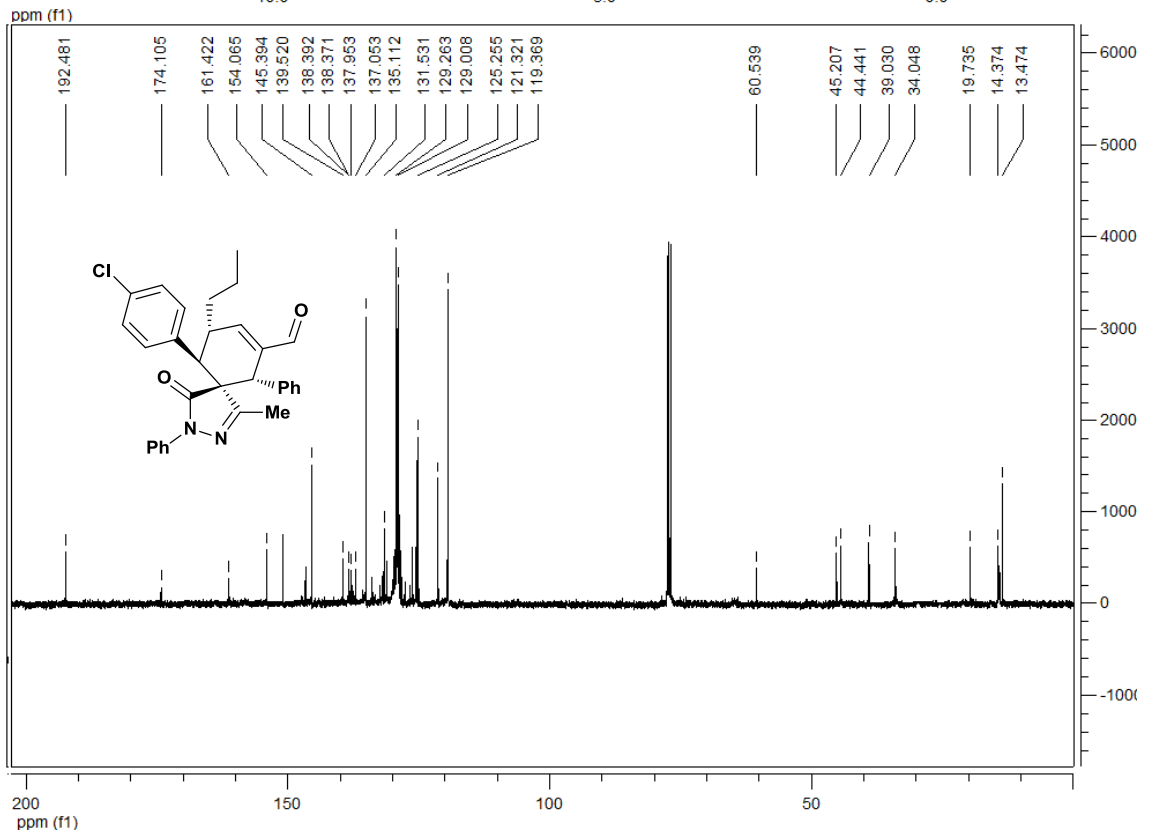

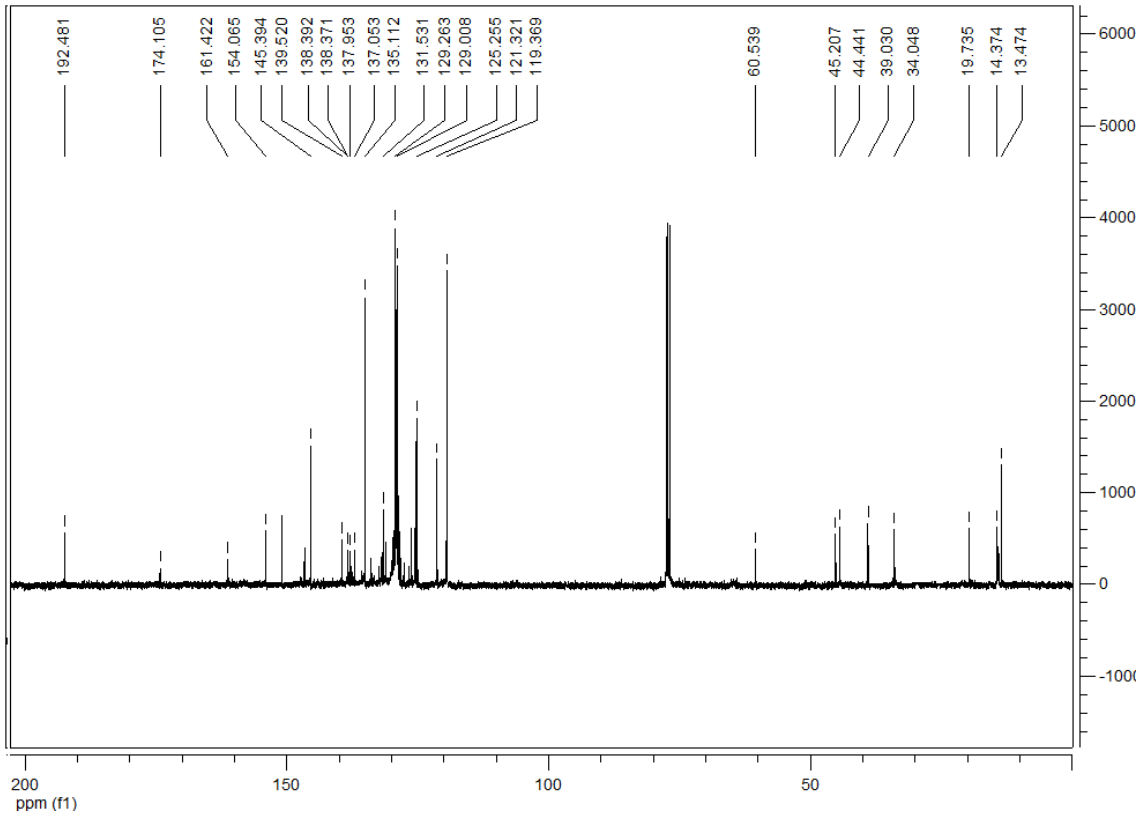

C:\LabSolutions\Data\Andrea-Nekane\Azn209\_Racemic1.lcd

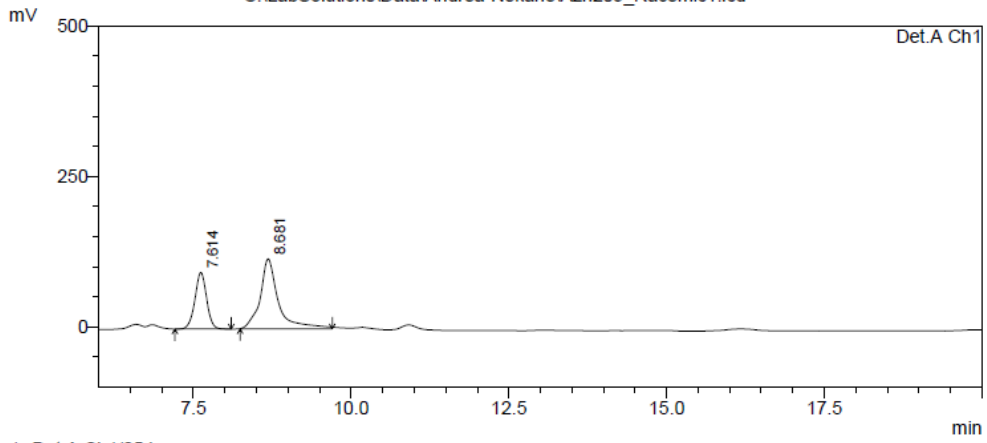

1 Det.A Ch1/254nm

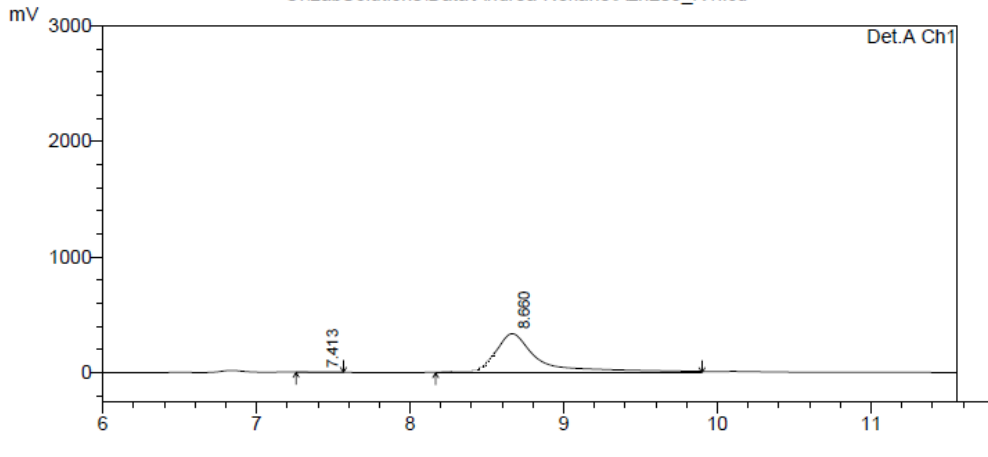

1 Det.A Ch1/254nm

PeakTable

| Detector A Ch1 254nm |           |         |        |         |          |  |
|----------------------|-----------|---------|--------|---------|----------|--|
| Peak#                | Ret. Time | Area    | Height | Area %  | Height % |  |
| 1                    | 7.413     | 2992    | 381    | 0.040   | 0.113    |  |
| 2                    | 8.660     | 7514055 | 337588 | 99.960  | 99.887   |  |
| Total                |           | 7517048 | 337969 | 100.000 | 100.000  |  |
